# Supplementary material for: Cloud identification and classification from high spectral resolutiondata in the far and mid infrared
Source: Copernicus journal article supplement (doi:10.5194/amt-2019-28), 2019-02-12
Supplement: Supplementary file [file amt-2019-28-AC3-supplement.pdf]

Reply to Anonymous Referee #2 concerning the AMT discussion paper entitled “Cloud identification and classification from high spectral resolution data in the far and mid infrared” by Tiziano Maestri et al.

In yellow our point by point responses to the Referee.

We would also like to thank the Referee for the positive comments and above all for the suggestions and requests of clarifications that helped in making the article much clearer and more readable.

## **Anonymous Referee #2**

**Received and published: 30 April 2019**

### **General Comments**

**The authors present the new cloud identification and classification algorithm CIC for far- and mid-infrared radiance measurements. The method is specifically designed for analysis of the ESA Earth Explorer candidate mission FORUM. Overall, I found this to be a scientifically sound study, which should be of interest for readers of AMT.**

We thank the Referee for the positive comment. The algorithm has been applied to high spectral resolution synthetic data simulating the FORUM mission but the methodology could be easily adapted to every satellite or ground sensor covering a large enough spectral band sensible to surface and atmospheric (clear and cloudy) features variations.

Currently, the CIC is applied to TAFTS and ARIES Fourier Spectrometers airborne data in collaboration with MetOffice and Imperial College (UK) within the Phase-A study of the Earth Explorer 9 ESA Fast Track mission and to the data from the interferometer REFIR-PAD that is ground-based at Dome-C station in the Antarctic Plateau.

A new sentence is added at the end of the Conclusions section to highlight the potentialities and easy adaptability of the CIC algorithm to new sensors and viewing geometries.

The new text is reported here for your convenience:

“...In the present work, CIC functionalities are illustrated for cloud detection application in presence of high spectral resolution far and mid infrared radiance observations. Nevertheless, the same algorithm can, in principle, be implemented to work with different kind of data (i.e low spectral resolution data) and also to perform sub-classifications, such as cloud phase identification. The CIC algorithm is easily adaptable to different viewing geometries and diverse high spectral resolution sensors. Currently, it is being tested against interferometric data in the far and mid infrared part of the spectrum collected by the airborne Tropospheric Airborne Fourier Transform Spectrometer (TAFTS, Canas et al. (1997)) and the Airborne Research Interferometer Evaluation System (ARIES, Wilson et al. (1999)) during the 2015 CIRCCREX (Cirrus Coupled Cloud-Radiation Experiment) campaign (Pickering et al., 2015) and to ground based data collected by the REFIR-PAD interferometer since 2012 from the Dome-Concordia station on the Antarctic Plateau (<http://refir.fi.ino.it/refir-pad-domeC>). “

**The manuscript could be a bit more concise and some English language editing may be needed, but it is mostly clear. I would recommend the paper for publication in AMT.**

The manuscript has been greatly improved also by applying all the grammar and typo corrections suggested by both referees and the Editor.

### **Specific Comments**

**page 1, line 2-3: Saying the method uses ‘a univariate distribution and a threshold’ without additional information may not be clear to the reader. A distribution of which variable or a threshold of which quantity?**

The sentence is modified as follows:

“... CIC is a machine-learning algorithm, based on Principal Component Analysis, able to perform a cloud detection and scene classification using a univariate distribution of a similarity index which defines the level of closeness between the analysed spectra and the elements of each training datasets.”

**page 1, line 1-10: I would suggest adding 1-2 sentences and numbers providing information on the accuracy and performance of the new CIC algorithm to the abstract.**

The performances are strictly related to the training and test sets accounted for thus a general statement is difficult to make. Anyway, a new sentence is added at the end of the abstract:

“... In particular, it is shown that hit scores for clear and cloudy spectra increase from about 70% up to 90% when far-infrared channels are accounted for in the classification of the synthetic dataset for tropical regions.”

**page 3, line 3: An univariate distribution of which quantity?**

True.

The sentence is changed to:

“CIC is a machine learning algorithm based on Principal Component Analysis, which performs an identification and classification using a single threshold applied to a univariate distribution of a newly defined parameter called similarity index (see Section 3.2) which determines the relatedness with a specific class (training set).”

**page 3, line 29-32: It may not be too important to mention here that ERA-Interim data can be retrieved via a web interface. Saying ‘surface height’ is computed from temperature, pressure, and geopotential heights is a bit confusing, as surface height (or surface geopotential) is already a parameter in the ERA-Interim database. Do you mean ‘geometric height’ or ‘height above the surface’?**

The sentence is re-phrased:

“This database, that provides 4 sets of data per day, is used to retrieve profiles of temperature, pressure, specific humidity, ozone mixing ratio, and surface geopotential height from which the geometric surface and atmospheric level heights are computed.”

**page 4, Fig. 1: The RTX acronym/code was not introduced at this point. Also, the reader will not know what ‘OD\_deflt’ means.**

The Figure has been redone and an extended caption is added and here reported:

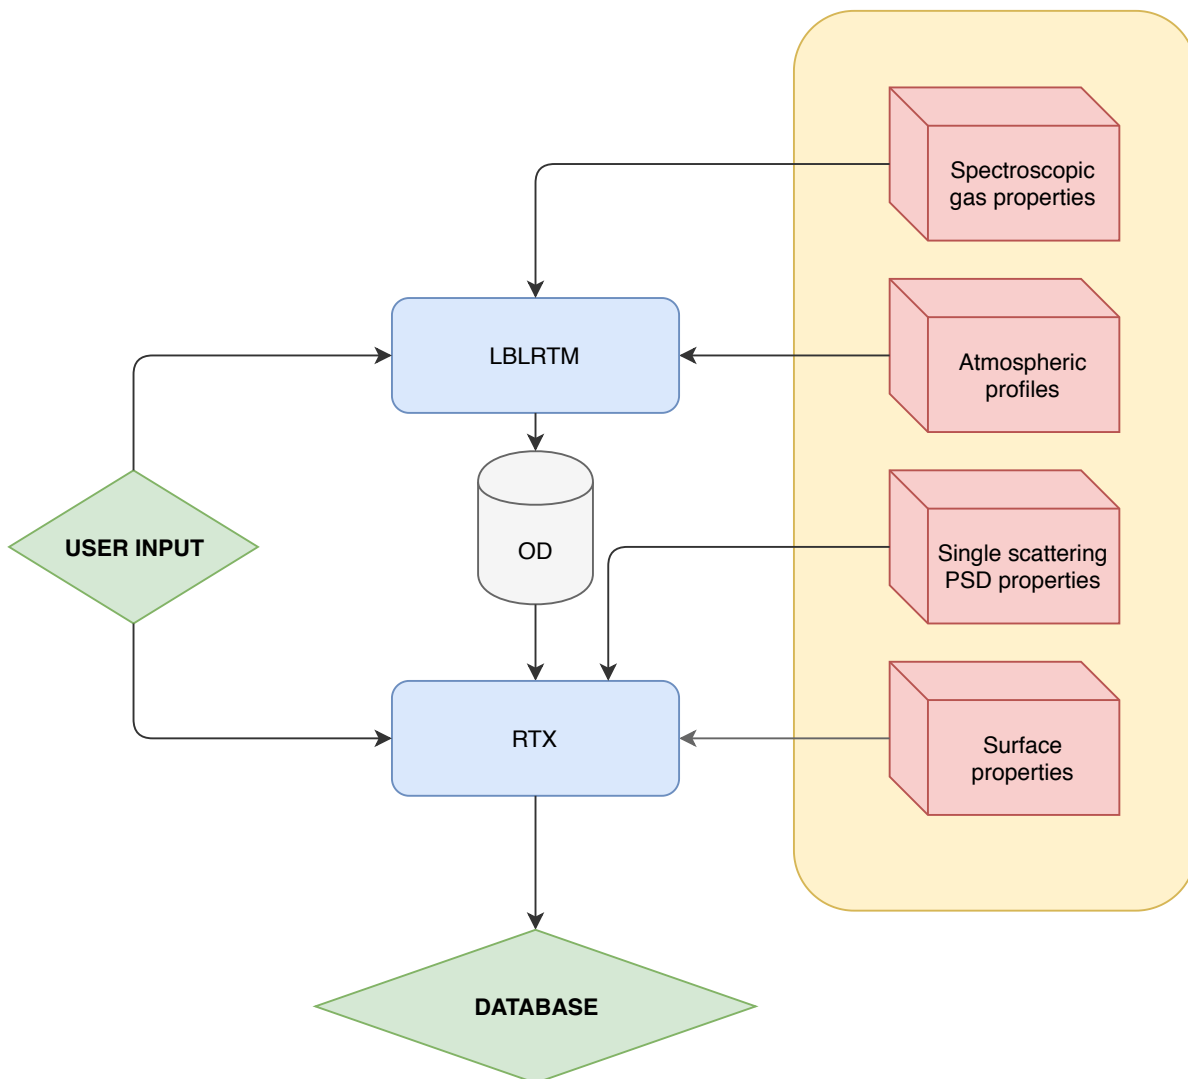

“Figure 1. Software architecture (schematic) of the simulation process used to build the synthetic dataset for FORUM-like observations. Blue boxes are codes, red ones are auxiliary datasets. The FORUM box includes the Fourier Transform Spectroscopy and the simulation of the FORUM noise. OD stands for gaseous optical depths computed using the Line-by-Line Radiative Transfer Model LbLRTM v12.7 (Clough et al. (2005)). The Radiative Transfer X (RTX) is described in Bozzo et al. (2010).”

page 5, line 14-19: Is noise to be expected the leading error of the FORUM measurements? Is there a reference (e.g. an ESA report) available, providing more detailed information on the FORUM instrument? Instead of ‘ideal measurement noise’ perhaps say ‘nominal measurement noise’?

NESR is the leading error of the FTS sensor of the FORUM mission. The mission is undergoing Phase A industrial studies and the updated mission requirements will be revealed during the Earth Explorer 9 User Consultant Meeting to be held in Cambridge, UK, 16-17 July 2019. The mission proposal with preliminary sensor requirements is available on request from the corresponding author Tiziano Maestri (tiziano.maestri@unibo.it).

The sentence is modified as follows:

“In a subsequent step, a nominal noise equivalent spectral radiance (NESR), as reported in the FORUM Proposal RCEE9/027 to ESA, is added to the simulated radiances in order to produce a realistic FORUM observations dataset.

...

The spectral dependence and amplitude of the noise are derived from the technical specification of the Fourier Transform Spectrometer instrument described in the FORUM proposal to ESA (available on request) and reported in Table 2.”

**page 6, Table 2: Can you provide a rough estimate on the percentage error of the noise estimates? The percentage errors might be rather large for the FIR part of the spectrum because measured radiances are quite low?**

A new sentence is added:

“The NESR values reported in the Table corresponds to a typical percentage noise of about 1% in the 200-800  $\text{cm}^{-1}$  wavenumber interval. The exact value depends on the specific wavenumber and observational conditions accounted for. Below 200  $\text{cm}^{-1}$  and above 1400  $\text{cm}^{-1}$  the percentage noise can be higher than 15% due to the low radiance values.”

**page 6, Table 3: ‘Polar regions’ covers both, polar winter and polar summer. Perhaps this should be split into the corresponding cases?**

Since the Table presents the dataset divided for latitudinal region and since the number of cases in polar regions is the lowest we would prefer to keep the Table like it is.

The values are anyway reported here for the Referee:

|              | Clear sky | Clouds [Liq / Mixed / Ice (svc)] |
|--------------|-----------|----------------------------------|
| Polar summer | 248       | 284 [00 / 24 / 260 (68)]         |
| Polar winter | 244       | 248 [00 / 24 / 224 (64)]         |

**page 11, line 17-19: This is providing a specific definition of the similarity index used in this study. Did you consider any other potential measures of similarity? Was there a specific rationale to chose this definition?**

We have defined this index since it accounts for all the spectral features that characterize the physical signal. As you can note, the same weight is associated to the loadings of the  $p^{\text{th}}$  principal components considered in the sum which defines the SI. This makes the CIC very sensible to any spectral signature introduced in the spectrum and thus able to capture the information content comprised in the far infrared part of the spectrum. A sentence is added in this regard:

“Using the same weight ( $1/2P_0$ ) for each term of the sum makes the SI very sensible to any spectral signature presents in the spectrum. ”

**page 13, Fig. 7: Make plots the same size.**

Done

**page 15, line 9: Perhaps say that ‘cardinality’ means ‘number of elements of the set’, which is simpler for non-mathematicians.**

Agreed and substituted.

**page 16, line 24 to p17, line 12: If the POSCO is not needed or evaluated during the rest of the manuscript, it may not have to be introduced here at all?**

Since the Detection Performance is based on the a-priori probability only we provided an explicit relation between PRISCO and POSCO for those who are more used to the a-posteriori probability.

**page 17, line 23: If I understood correctly, only a subset of all FORUM channels is considered. Is there any exploitable information content in the unused parts of the FORUM spectrum?**

True we have used channels in the 100-1300  $\text{cm}^{-1}$  range.

In the first part of the article some forward simulation results have been plotted to show the sensitivity of the radiance spectrum to the surface, atmospheric and cloud parameters. Results show that the 300-1330  $\text{cm}^{-1}$  part of the spectrum is the most sensible to cloud features variation. This is also shown in Maestri et al. (2019) for downwelling radiances and by means of a linear discriminant analysis.

An additional reason is due to the low FORUM signal-to-noise-ratio for wavenumbers above 1300  $\text{cm}^{-1}$  because of the low values of the spectral radiance and of the large nominal NESR at those wavenumbers (as discussed above). This is also true for wavenumber below 300  $\text{cm}^{-1}$  but we have decided to retain this extreme part of the spectrum in the study due to the scarcity of the study concerning the FIR found in literature. Also, it is shown how the detection performances reduces when channels below 238  $\text{cm}^{-1}$  are used and a possible explanation is related to the almost null radiance sensitivity to cloud features in that band.

**page 18, line 1: At this point, it may not be clear why a correlation between the Col and DP can be found? From Fig. 9 this correlation does not become very evident, as these plots basically seem to show point clouds with some outliers? What is the correlation coefficient between Col and DP?**

The purpose of the figures is not to show the correlation functionality between the two variables. The goal is to highlight that high detection performance is mainly reached for large consistency indexes. Note that the right panel DPs are higher than those found in the left panel that correspond to smaller Col. This relation is observed also in Figure 10.

**page 19, line 9-14: What is the rationale for creating different TraNCs? Is this meant to reflect a priori knowledge on real cloud distributions in the atmosphere?**

Multiple training sets are created (by randomly selecting the elements) in order to show the generality of some aspects of the classification process. The main goal of the paper, apart from describing a new methodology, is to show that the far infrared part of the spectrum contains useful information that can be exploited to greatly improve the scene classification in absence of shortwave scattered radiation (i.e. Figure 9 and 13). This is demonstrated statistically using a large set of different training sets composed by randomly selected elements with the only constrain on the number of each class elements. If this was done using a single training set, with manually selected spectra, it would have been susceptible of subjectivity. As far as the different Training sets number composition (TraNCs), these are used to investigate if an optimal fraction of clear to cloudy spectra in the training sets exists for the specific datasets to which the classification is applied. It is shown that statistically the 70clear-30cloudy number composition works better (i.e. Figure 10) but very high scores are also obtained with the 50-50 number compositions. For specific observing conditions (i.e. the analysis of data from the 2015 CIRCCREX campaign mentioned above) we have generated clear and cloudy training sets with the same number of elements that are specifically created to reproduce the natural variability characteristic of the experimental site.

**page 19, line 1: Was the tropical test case selected for presentation because it is the most difficult or most simple case?**

Simulations are performed for all the cases. Classifications results are also shown for all the latitudes and seasons. The Tropics are used as example for the definition of an optimised training set because of the large number of synthetic spectra available and of the large variability of the simulated conditions spanning from hot clear desert scenes to warm low level liquid phase marine strati to very thin High-Troposphere cirri and dense hurricane's clouds. Classifications are though performed also at Mid and Polar latitudes.

page 19, line 1-2: I was wondering if it is sufficient to use only one test set (per class) for validation of the classification methods. The classification method might be tuned to work best only for the specific test set and may show different results for another test set. Did you consider to rerun the analysis with a different choice of test sets?

We have used this subdivision only for the definition of an optimisation strategy and for the training set number composition. The methodology is applied to different test set when different latitudes and seasons are accounted for. The code algorithm is tested against very different conditions that are intended to reproduce most of the natural variability encountered all over the globe.

We also have seen that for specific observational conditions (like the ones encountered in the 2015 CIRCCREX campaign or the ones concerning the ground based data collected by the REFIR-PAD interferometer at Dome-Concordia station on the Antarctic Plateau) the classification results are much higher than those presented here that refers to a very challenging test set filled with large number of sub-visible-cirrus clouds that are very difficult to detect.

page 20, Fig. 10: Do the results presented here change if another test set is used?

As discussed above the results are probably slightly dependent on the test set. The results obtained in this section are functional to the more general results shown in the following figures (i.e. Figure 11 and 12). They serve to define an optimised training set that is then adopted to find the main results of the paper. Different training sets can be used as reference without changing the main result that states that the use of FIR channel improves the classification scores.

page 21, Table 4: Perhaps choose more even bins for OD, i.e., 0.1 to 0.3 and 0.3 to 1 rather than 0.1 to 0.5 and 0.5 to 1.0?

The Table has been changed due to a type spotted by the other Referee. The new Table 4 is here reported for your convenience. We would like to keep the number as they are also since the numbers of elements in the RETS between 0.1 and 1.0 is just 4.

| Training and test set cloud ODs |           |          |
|---------------------------------|-----------|----------|
| Range                           | RETS      | Test set |
| $OD \leq 0.1$                   | 8 (6.3%)  | 126      |
| $0.1 < OD \leq 0.5$             | 3 (2.3%)  | 131      |
| $0.5 < OD \leq 1$               | 1 (5.3%)  | 19       |
| $1 < OD \leq 3$                 | 14 (4.5%) | 308      |
| $3 < OD \leq 10$                | 0 (0%)    | 21       |
| $OD > 10$                       | 4 (6.8%)  | 59       |
| Total                           | 30 (4.5%) | 664      |

page 21, line 13: Which CO2 band is meant?

Sentence is rephrased to:

“Thus the full spectrum spans over the 100-1300  $\text{cm}^{-1}$  spectral range with the exception of a limited wavenumber interval in the  $\nu_2$  CO<sub>2</sub> band centred at around 667  $\text{cm}^{-1}$ .”

**page 22, line 10-12: Can you explain the initial decrease in performance when the first FIR channels are added to the classification?**

A new sentence is added:

“Results show that performance gradually improves for increasing number of FIR channels. In particular, there is a slight decrease in performance after adding the 12 channels closest to the CO<sub>2</sub> v<sub>2</sub> band centre which are mostly insensible to cloud parameters due to strong absorption of the carbon dioxide. The decrease is gradually offset by improvements obtained when channels in the [238.8–545.4] cm<sup>-1</sup> wavenumber range are added.”

**page 23, Fig. 11: Perhaps it could help to add a few more data points to this figure, to better understand what is happening when the first FIR channels are added to the classification?**

We think that the mechanism is clear and we have discussed it in the point above. The selection of the FIR channels ( $N_{\text{feat}}$ ) follows the formula described in equation 30. We decided to start our selection at 640 cm<sup>-1</sup> in order to include channels with strong CO<sub>2</sub> absorption. We did not know a-priori which channels could have brought a sensible improvement in the classification scores. The major interest is focussed on the full FIR band at this stage.

**page 23, line 12-13: I am afraid I do not understand the sentence ‘Note that the DP value is the minimum...’ in this context. Can you explain it a bit better?**

Correct. The sentence has been re-phrased:

“Note that the DP value is the minimum between the hit rate computed for cloudy sky cases and clear sky cases (see equation 25) and thus is indicative of the CIC ability to correctly classify either clear and cloudy spectra.”

**page 24, Fig. 12: I have some difficulty identifying any clear correlation between OD and CSID from these figures.**

The Figure is not intended to show a relation between OD and CSID. The plot wants to show the ability to classify the scene for different ODs. CSID is the classifier (larger than 0 we have a cloudy sky classification). On the left it is shown, that when using the MIR only, a large number of cloudy sky cases are classified as clear sky (blue circles). On the right it is shown that the number of False Positives is strongly reduced when using the full spectrum (MIR+FIR) and even if a single clear sky is misclassified and identified as cloudy (green x) the overall performance is greatly improved by a correct classification of the majority of cloudy sky cases.

**page 27, line 1-4: This sounds as if almost every linear algebra problem can be solved with an  $O(n^2 \log n)$  algorithm, which is too general. I would rephrase this a bit and just refer to the algorithms used in this study.**

We have re-phrased:

“Raz (2003), shows than a lower bound for time complexity of matrix multiplication is  $O(n^2 \log(n))$  and Demmel et al. (2007)) demonstrated that the same time complexity bound applies to most other linear algebra problems, including eigenvector computation, as performed by CIC.”

**page 29, line 21-22: Can you quantify this? How much higher are the scores?**

The value is added to the sentence:

“When optimisation is applied higher scores are obtained, as measured by the increased detection performance (DP, see Section 4) parameter that can reach values as high as 0.95.”

**page 30, line 2-3: Can you quantify this? How much better was the detection of thin cirrus?**

Some number are provided:

“The hit scores for cirrus clouds with optical depth less than 0.06 moves from about 25% when using the mid infrared only to about 60% when exploiting also the FIR part of the spectrum. It is shown that, in tropical regions, the overall detection performances exploiting the full spectrum can be very high (higher than 0.9 for the present dataset that is very challenging for the large presence of sub visible cirri) when the appropriate training set is selected.”

**All Figures: Please check and enlarge the font size of the labels to make them better readable.**

Most of the Figures have been resized

### Technical Corrections

**page 1, line 8: change ‘i.e’ to ‘i.e.’**

done

**page 2, line 10: introduce REFIR-PAD acronym**

done

**page 2, line 19-20: check that acronyms are properly introduced**

all acronyms are re-checked. A list of acronyms is provided at the beginning of the article.

**page 2, line 31: change ‘mostly widely’ to ‘most widely’**

corrected

**page 2, line 32: change ‘Feature’ to ‘feature’**

corrected

**page 2, line 33: change ‘Spectral Fitting’ to ‘spectral fitting’**

corrected

**page 3, line 12: change ‘profiles’ to ‘conditions’**

changed

**page 3, line 14: rephrase to ‘the CIC algorithm’**

done

**page 3, line 32: change ‘Era-Interim’ to ‘ERA-Interim’**

done

**page 4, line 8: change ‘fulfil this information’ to ‘add information’**

changed

**page 4, line 11: change ‘of the spectrum representatives of’ to ‘representative of’**

changed

**page 4, line 15: change ‘Scattnlay’ to ‘ScattNLay’**

changed

**page 4, Table 1: change ‘Cloud properties’ to ‘Cloud property’**

changed

**page 6, line 12: change ‘a presence’ to ‘the presence’**

changed

**page 7, line 3: change ‘(CIC’ to ‘(CIC)’ (or delete)**

changed

**page 11, line 4: change ‘line’ to either ‘row’ or ‘column’ (as applicable)**

corrected to “row”

**page 11, line 19 and page 12, line 15: remove extra brackets () for ETREM term**

removed



page 16, line 2: perhaps replace 'an algorithm' by 'a cloud classification algorithm' to be more specific?

Suggestion accepted

page 16, line 19: change 'i,:' to 'i:'

done

page 17, line 15: change 'are evaluated' to 'is evaluated'

The word "performances" also changed to "performance" to be coherent with Referee suggestion: "In this section the performance of the CIC cloud detection algorithm is evaluated for multiple atmospheric conditions."

page 17, line 24: change 'but a small' to 'except for a small'

done

page 19, line 19: fix 'The the'

corrected

page 23, line 1: rephrase to 'a function'

done

page 23, line 8: rephrase to 'The left plot'

done

page 25, line 11: DP values are ... than 0.7 \*and\* for Col

Not clear to us what we should change. We have re-phrase the sentence

"Moreover, in this case, DP values are on average larger than 0.7 for Col larger than 0.85."

To

"Moreover, in this case, DP values are on average larger than 0.7 when Col are larger than 0.85."

page 25, line 27: rephrase to 'When the elementary'

done

page 25, line 33: change 'intel' to 'Intel'

done

page 27, line 2: delete 'it is found'

the sentence has been rephrased in accordance with previous comment of the Referee

page 27, line 12: change 'a multiple number' to 'different numbers'

done

page 28, Fig. 15: change 'not linear' to 'non-linear'

done

page 28, line 1: change 'every approximately' to 'about every'

done

page 28, line 5: rephrase to 'cloud spectra detection and classification'

done

page 29, line 6: change 'defines' to 'evaluates'

done

page 29, line 7: change 'provide' to 'provides'

done

page 29, line 11: change 'do' to 'does'

done

page 29, line 19: change 'somehow interpretable as' to 'related to'

changed

page 29, line 23: rephrase 'computed to simulate'

Not clear to us what we should change

page 29, line 33: change 'point out' to 'assess'

done

page 30, line 1: rephrase to '238-545  $\text{cm}^{-1}$  wavenumber range is improving the'  
done

page 30, line 5-6: change 'noted as' to 'noted that'  
done

# Cloud identification and classification from high spectral resolution data in the far and mid infrared

Tiziano Maestri<sup>1</sup>, William Cossich<sup>1</sup>, and Iacopo Sbrolli<sup>1</sup>

<sup>1</sup>Alma Mater Studiorum - Università di Bologna

**Correspondence:** tiziano.maestri@unibo.it

**Abstract.** A new Cloud Identification and Classification algorithm, named CIC, is presented. CIC is a machine-learning algorithm, based on Principal Component Analysis, able to perform a cloud detection and scene classification using a univariate distribution of a similarity index which defines the level of closeness between the analysed spectra and the elements of each training datasets. CIC is tested on a widespread synthetic dataset of high spectral resolution radiances in the far and mid infrared part of the spectrum simulating measurements from the ESA Earth Explorer Fast Track 9 competing mission FORUM (Far Infrared Outgoing Radiation Understanding and Monitoring) that is currently (2018/19) undergoing the industrial and scientific Phase-A studies. Simulated spectra are representatives of many diverse climatic areas, ranging from the tropical to polar regions. Application of the algorithm to the synthetic dataset provides high scores for clear/cloud identification, especially when optimisation processes are performed. One of the main results consists in pointing out the high information content of spectral radiance in the far-infrared region of the electromagnetic spectrum to identify cloudy scenes, specifically thin cirrus clouds. In particular, it is shown that hit scores for clear and cloudy spectra increase from about 70% up to 90% when far-infrared channels are accounted for in the classification of the synthetic dataset for tropical regions.

## List of acronyms

- BT - Brightness Temperature
- CoI - Consistency Index
- CIC - Cloud Identification and Classification
- 5 CSID - Corrected Similarity Index Difference
- DP - Detection Performance
- ETR - Extended Training Set
- ETREM - Extended Training Set Eigenvector Matrix
- FIR - Far InfraRed
- 10 FN - False Negative
- FP - False Positive
- FORUM - Far-infrared Outgoing Radiation Understanding and Monitoring
- IBEC - Information-BEaring principal Component
- IG2 - Initial Guess database number two
- 15 ILS - Instrumental Line Shape
- IND - INDicator function
- LbLRTM - Line by Line Radiative Transfer Model
- MIDWIN - MID-latitude WINter
- MIR - Mid InfraRed
- 20 MT\_CKD - Mlawer, Tobin, Clough, Kneizys and Davies water vapor continuum model
- NESR - Noise Equivalent Spectral Radiance
- OD - Optical Depth
- PCA - Principal Component Analysis
- POLSUM - POLar SUMmer
- 25 POLWIN - POLar WINter
- POSCO - A POsteriori classification SCOrer
- PRISCO - A PRIori classification SCOrer
- RE - Real Error
- REFIR-PAD - Radiation Explorer in the Far InfraRed: Prototype for Applications and Development
- 30 RETS - REference Training Set
- RFTS - Refir Fourier Transform Spectrometer
- RTX - Radiative Transfer X
- TN - True Negative
- TP - True Positive

TR - Training Set

TraNC - Training set Number Configuration

TREM - Training Set Eigenvector Matrix

TROSUM - TROpical SUMmer

5 TROWIN - TROpical WINter

SI - Similarity Index

SID - Similarity Index Difference

## 1 Introduction

At the end of 2017 the European Space Agency has selected FORUM (Far-infrared Outgoing Radiation Understanding and Monitoring) mission as one of the two instrument concepts to compete for the Earth Explorer 9 satellite program. FORUM is based on a Far-Infrared Spectrometer devoted to high spectral resolution (nominally  $0.3 \text{ cm}^{-1}$ ) measurements from 100 to 5 1600  $\text{cm}^{-1}$  thus including the so called Far InfraRed (FIR) region, spanning from 100 to 667  $\text{cm}^{-1}$ .

The FIR represents an important fraction of Earth's outgoing longwave radiation, which contributes considerably to the planetary energy balance. The atmospheric emission in the FIR is driven by the rotational absorption band of the water vapour molecules and is characterised by strong absorption lines interspersed by narrow regions (called *dirty micro-windows*), where absorption is less intense. The strong absorption features of water vapor roto-vibrational lines cause atmospheric weighting 10 functions in the FIR to peak in the Middle/Upper Troposphere thus making the on-line upward emission particularly sensitive to the atmospheric thermodynamic profile and water vapor content of the highest tropospheric levels. Micro-window radiance is highly sensitive to water vapour mixing ratio (Maestri et al. (2014)) and also affected by the *water vapour continuum absorption*, that is usually modelled through observations (Mlawer et al. (2012), Serio et al. (2008)). Moreover, the condensed phases of water, in form of liquid water and ice clouds, also affect Earth's radiation budget significantly (Sinha and 15 Harries (1995)) and, in particular, the presence of ice clouds causes lower emitting temperatures and, hence, a shift towards longer wavelengths (thus towards the FIR) of the peak of the black-body emission distribution function. For this reason, a detailed study of the Earth's radiation budget should account for global, accurate, all-sky conditions measurements of the exiting radiance, including the FIR.

As many recent studies have shown, due to the large sensitivity of the upward radiance in the far infrared part of the spectrum 20 to water vapor and clouds, the FIR can be used to complement standard remote sensing measurements performed in the Mid InfraRed (MIR) part of the spectrum in order to retrieve atmospheric water vapour profile, for cloud detection, classification, and properties derivation. In Merrelli (2012) it is demonstrated that the retrieval of cloud properties and water vapour mixing ratio in the Mid and High Troposphere is more accurate if FIR spectral information (i.e. radiance) is considered. Moreover, in Palchetti et al. (2016) it is shown that by using the full infrared emission spectrum more information may be retrieved 25 about cirrus cloud microphysical properties. In Maestri et al. (2019) it is shown that far infrared Radiation Explorer in the Far InfraRed - Prototype for Applications and Development (REFIR-PAD) channels hold additional information for cloud detection and cloud phase classification from ground-based measurements.

Along the line of these recent research studies, in this work, an innovative cloud identification/classification technique, with application to infrared high spectral resolution synthetic data including the far infrared part of the spectrum, is presented. 30 Many different cloud detection techniques exist and the majority of them exploit data spanning from infrared to shortwave, which limits their applicability to daytime hours only. An example of such a technique is the Principal Component Analysis (PCA) based detection algorithm presented by Ahmad (2012). Other techniques rely on outgoing longwave radiation only; one example is the algorithm presented in Serio et al. (2000), which is tailored to work on water surfaces. Among the techniques exploiting outgoing longwave radiation only, and applied globally, the cumulative discriminant analysis by Amato et al. (2014),

the CNRM scheme by McNally and Watts (2003), the Met Office 1D-Var retrieval system (Pavelin et al. (2008)), the NCEP minimum residual method (Eyre (1989)), and the Centre de Météorologie Spatiale (CMS) cloud mask (Lavanant and Lee (2002)) are mentioned. These methodologies are applied to spaceborne spectrometers and radiometers such as the Atmospheric InfraRed Sounder (AIRS), the Infrared Atmospheric Sounding Interferometer (IASI), and the Advanced Very-High-Resolution Radiometer (AVHRR). The last three methodologies perform cloud detection and classification simultaneously. They also depend on ancillary information regarding the atmospheric state, derived from Numerical Weather Prediction models. McNally and Watts (2003), for example, analyse the difference between simulated clear sky spectra and the measured spectra to detect the presence of clouds, using the global model of the European Centre for Medium-range Weather Forecasts (ECMWF) to make a short term forecast of the atmospheric state.

Most cloud detection schemes rely on the definition of some statistical parameter, which serves as a classifier, and on a statistical technique used to assign a value to the classifier. Both the cumulative discriminant analysis and the Met Office 1D-Var retrieval system seek the minimisation of a cost function. This minimisation produces the classification label of the spectrum and an estimate of the cloud fraction, respectively.

Some of the detection algorithms used for cloud identification have been adapted for aerosol detection and some innovative methodologies have been recently developed. A comprehensive overview of the most widely used techniques for aerosol detection and classification, such as feature detection methods based on thresholds and brightness temperature differences, spectral fitting minimisation methods, approaches based on look-up-tables and minimisation of the Mahalanobis distance, and methods based on singular value decomposition and PCA, is provided in Clarisse et al. (2013).

Taking the cue from existing cloud detection algorithms, a Cloud Identification and Classification (CIC) method is developed. CIC is a machine learning algorithm based on Principal Component Analysis, which performs an identification and classification using a single threshold applied to a univariate distribution of a newly defined parameter called similarity index (see Section 3.2) which determines the relatedness with a specific class (training set). It is, partially based on other works (see Malinowski (2002) and Turner et al. (2006) for reference) and, with respect to previously described methods, has the advantages of being easy to implement, user-friendly, fast and efficient.

In this paper, the CIC algorithm is used to perform cloud detection on a synthetic dataset consisting of infrared spectra with wavenumbers ranging from 100 to 1600  $\text{cm}^{-1}$  and a nominal resolution equal to 0.3  $\text{cm}^{-1}$ , created to simulate satellite measurements of the FORUM mission. Cloud detection is performed both using the MIR only or the full spectrum (FIR and MIR), so that the detection performances could allow an evaluation of far-infrared channels information content in realistic conditions. The algorithm is applied to simulated FORUM measurements from different climatic areas in order to observe the influence of atmospheric conditions on detection scores.

This paper is organized as follows. In Section 2 the synthetic dataset is illustrated; Section 3 is dedicated to the CIC algorithm description and functionalities. Section 4 deals with results obtained from CIC application to FORUM synthetic data. A brief summary is drawn in Section 5.

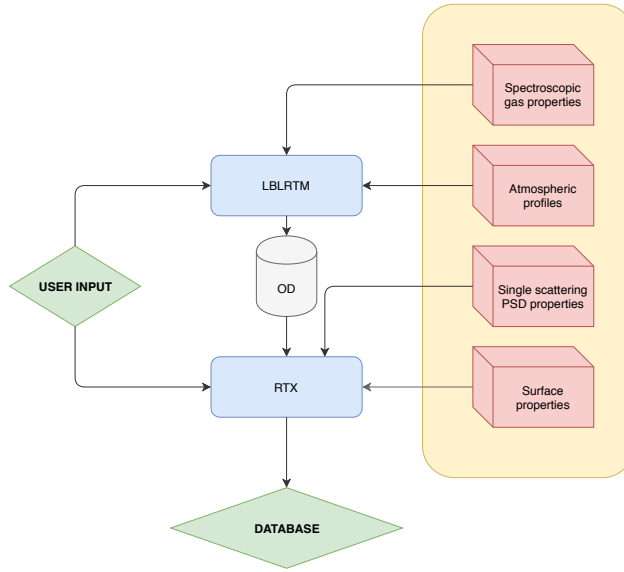

**Figure 1.** Software architecture (schematic) of the simulation process used to build the synthetic dataset for FORUM-like observations. Blue boxes are codes, red ones are auxiliary datasets. The FORUM box includes the Fourier Transform Spectroscopy and the simulation of the FORUM noise. OD stands for gaseous optical depths computed using the Line-by-Line Radiative Transfer Model LbLRTM v12.7 (Clough et al. (2005)). The Radiative Transfer X (RTX) is described in Bozzo et al. (2010).

## 2 Synthetic dataset

A widespread dataset of simulated radiances for multiple atmospheric conditions is computed in order to test the cloud identification and classification algorithms. The synthetic dataset is built using a chain of codes to perform accurate line-by-line multiple scattering computations as represented in Fig. 1. The computational methodology is similar to the one described by Bozzo et al. (2010) and the radiative transfer equation is solved through an adding-doubling algorithm for a plane-parallel geometry and simulating the FORUM satellite nadir view.

The line-by-line computations of layer spectral optical depths are performed using the Line-by-Line Radiative Transfer Model LbLRTM v12.7 (Clough et al. (2005)), whose inputs are atmospheric vertical profiles and spectroscopic gas properties. This model includes a recently updated water vapour continuum parameterisation, MT\_CKD (Mlawer et al. (2012)) version 3.0, and a consistent spectroscopic database, AER version 3.5, built from HITRAN2012 (Rothman et al. (2013)). The atmospheric thermodynamic vertical profiles and gas mixing ratios (such as those of  $\text{H}_2\text{O}$ ,  $\text{CO}_2$ ,  $\text{CH}_4$ ,  $\text{O}_3$  and for a total of 22 molecules) are derived from different sources. The first one is the ERA-Interim reanalysis (Dee et al. (2011)), with a horizontal resolution equal to 0.75 degrees (approximately 80 km) and 60 vertical levels from the surface up to 0.1 hPa. This database, that provides 4 sets of data per day, is used to retrieve profiles of temperature, pressure, specific humidity, ozone mixing ratio, and surface geopotential height from which the geometric surface and atmospheric level heights are computed. The daily January, April, July, and October 2016 ERA-Interim reanalysis data are downloaded for the dataset generation in order to reproduce the



seasonal and daily variations of the thermodynamic variables. Grid points from Tropics, Mid latitudes and Polar regions (Arctic and Antarctic) are selected.

The second source of information is the Initial Guess climatological database IG2 (Remedios et al. (2007)) which includes atmospheric profiles for six latitude bands, four seasons, and two times of the day. This database spans from 2007 onwards, with constant vertical resolution of 1 km, from the surface up to 120 km and provides time-averaged data concerning altitude, pressure, temperature and a wide range of gas mixing ratio profiles.

ERA-Interim reanalysis data is thus used to characterise the daily variation of the main atmospheric parameters up to approximately 60 km of height and the IG2 is used to add information in the highest atmospheric layers and to provide information concerning minor gases mixing ratios.

Surface emissivity properties are selected in accordance with geolocation by using the global database produced by Huang et al. (2016). The database includes 11 types of spectral emissivity in the infrared region of the spectrum representative of rainforest, temperate deciduous forest, conifer forest, grass, dry grass, desert, ocean, coarse/medium/fine snow, and ice.

The cloud microphysical properties are generated by integrating the Ping Yang database, consisting of single scattering properties of randomly oriented non-spherical ice crystals (Yang et al. (2013)), over a large set of gamma type size distributions.

Liquid water and mixed phase spherical particles radiative properties are derived through the ScattNlay code (Peña and Pal (2009)) and subsequently used to get bulk properties of particle size distributions. The mixed phase spheres consist of a core of ice surrounded by a coating of liquid water. This shell of liquid is modelled as a coating of 10 or 20% of the radius of the entire particle. In the simulations many cloud properties are varied: cloud top height, geometrical thickness, optical thickness, particle size distribution, mean effective dimension, particle shape, and phase (ice, liquid water, and the two levels of mixed phase). The cloud properties inputs to the radiative transfer code are modified over large ranges of values in order to account for the largest possible variability encountered in nature. Some datasets and recent studies are considered as baseline. The International Satellite Cloud Climatology Project ISCCP (Rossow and Schiffer (1999), Hahn et al. (2001)) is an example. Cirrus clouds properties in the Tropics and at Mid Latitudes are mostly based on what was found by Veglio and Maestri (2011) while Antarctic cloud properties are obtained from several sources (i.e. Adhikari et al. (2012), Bromwich et al. (2012), Lachlan-Cope (2010)). In Table 1 the range of variability of some key cloud properties is reported.

As illustrated in Fig. 1, for each selected atmospheric condition, high spectral resolution optical depths of atmospheric layers are computed using LbLRTM and the results are passed as inputs to the Radiative Transfer X (RTX) and, when in presence of clouds, the gas optical depths are merged with those derived from cloud properties (see Bozzo et al. (2010)). RTX, which is based on the doubling and adding method [Evans and Stephens (1991)] and thus capable to solve the full radiative transfer equation in multiple scattering conditions, is then run to obtain the high spectral resolution radiances that are finally convoluted with an ideal FORUM like Instrument Line Shape (ILS) that is assumed to be a sinc function.

This operation produces unapodised spectra with  $0.3 \text{ cm}^{-1}$  spectral resolution over a spectral range spanning from 100 to  $1600 \text{ cm}^{-1}$  representative of FORUM mission noiseless observations. In a subsequent step, a nominal noise equivalent spectral radiance (NESR), as reported in the FORUM Proposal RCEE9/027 to ESA, is added to the simulated radiances in order to produce a realistic FORUM observations dataset. The new dataset is computed by adding a gaussian wavenumber-dependent noise

**Table 1.** Range of variability of the main cloud properties used in the simulations. The habit type indicates the assumed pristine shapes of the ice crystals. The mixed phase water coating indicate the percentage of liquid water coating with respect to the dimension of the assumed spherical particle.

| Cloud property                                | Range                                       |
|-----------------------------------------------|---------------------------------------------|
| Top height (km)                               | 1.0 – 17.0                                  |
| Geometrical Thickness (km)                    | 1.0 – 5.0                                   |
| Optical Depth                                 | 0.02 – 30.0                                 |
| Habit Type                                    | Plate, Column,<br>Bullet rosette, Aggregate |
| Mixed phase water coating                     | 10% and 20%                                 |
| Ice particle Eff. Dimension ( $\mu\text{m}$ ) | 4 – 100                                     |
| Liquid water Eff. Radius ( $\mu\text{m}$ )    | 3 – 15                                      |
| Mixed phase Eff. Radius ( $\mu\text{m}$ )     | 3 – 15                                      |

**Table 2.** Random noise used to simulate the Fourier transform spectrometer of the FORUM mission.

| Interval ( $\text{cm}^{-1}$ ) | Noise ( $\text{mW}/(\text{m}^2\text{srcm}^{-1})$ ) |
|-------------------------------|----------------------------------------------------|
| 100-200                       | 1.0                                                |
| 200-800                       | 0.4                                                |
| 800-1600                      | 1.0                                                |

to the noiseless radiances. The spectral dependence and amplitude of the noise are derived from the technical specification of the Fourier Transform Spectrometer instrument described in the FORUM proposal to ESA (available on request) and reported in Table 2. The NESR values reported in the Table corresponds to a typical percentage noise of about 1% in the 200-800  $\text{cm}^{-1}$  wavenumber interval. The exact value depends on the specific wavenumber and observational conditions accounted for. Below 5 200  $\text{cm}^{-1}$  and above 1400  $\text{cm}^{-1}$  the percentage noise can be higher than 15% due to the low radiance values.

A spectral random noise is computed for each spectrum. The Central Limit theorem is used so that the sum of random numbers ( $r_{tot}$ ) from a uniform distribution ranging from -0.5 to 0.5 (variance is 1/12) is used to generate a gaussian variable ( $r_{gauss}$ ) with mean 0 and a standard deviation,  $\sigma_\nu$ , assumed to be equal to the FORUM noise. The spectral random noise is thus obtained by using the following formula:

$$10 \quad r_{noise} = \sqrt{\frac{12}{r_{tot}}} \cdot \sigma_\nu \cdot r_{gauss}$$

A schematic summary of the whole dataset, comprising of 4244 simulated spectra, is presented in Table 3 for each latitude belt and for the clear or cloudy class. Some example of spectra are shown in Fig. 2, 3, 4 and 5.

**Table 3.** Number of clear and cloudy simulated spectra for each latitude belt. In parenthesis the number of liquid water clouds (Liq), of mixed phase clouds (Mixed), of ice clouds (ice) and, among these, the number of sub visible cirrus (svc), consisting in high altitude cirri with optical depths less than 0.03, are shown.

|               | Clear sky | Clouds [Liq / Mixed / Ice (svc)] |
|---------------|-----------|----------------------------------|
| Tropics       | 704       | 986 [16 / 61 / 909 (212)]        |
| Mid Latitudes | 615       | 765 [96 / 48 / 621 (173)]        |
| Polar regions | 492       | 532 [00 / 48 / 484 (132)]        |

In Fig. 2, the brightness temperature sensitivity (with respect to a reference clear sky case) is shown for three different cases in the Tropical atmosphere: a sub-visible cirrus cloud (black line), the clear sky case with a 3 K decrease in skin surface temperature (yellow line) and the clear sky case with a an increase of 10% along the vertical profile of the water vapour mixing ratio (blue line). The cirrus is assumed to be composed of plates with effective dimension of 20  $\mu\text{m}$ , optical depth  $\text{OD}=0.03$  and geometrical thickness 1 km. Results show distinctive spectral features due to the presence of the cirrus cloud in the satellite view. In particular, for the tropical region, the radiance signal in the FIR exiting from the surface is masked by the strong absorption by the water vapour rotational band (which is almost saturated for wavenumbers below 300  $\text{cm}^{-1}$ ).

In Fig. 3 the large Brightness Temperature (BT) sensitivity to cloud particle size distribution effective dimensions is highlighted for channels in the MIR windows and also for wavenumbers between 400 and 600  $\text{cm}^{-1}$ . Cloud properties are:  $\text{OD}=1.5$ , geometrical thickness 1 km, cloud top is at 14 km.

Sensitivity to cloud particle phase is shown in Fig. 4. In the computations a Polar cloud ( $\text{OD}=7$ , geometrical thickness 1.5 km, cloud top is at 5 km) made of spheres of pure ice, liquid water or of two diverse mixed phases (see figure caption for the details) is assumed. The results show that the highest BT sensitivity to phase is found at FIR wavenumbers. Note also how the mixed phased spheres resemble the pure ice phase in the MIR window channel and the pure liquid water in the FIR channels.

Finally, in Fig. 5 the sensitivity to crystal habit is shown. Four different habits (aggregates, plates, bullet rosettes and solid columns) are assumed in the simulation of 4 different tropical cirrus clouds with the same features ( $\text{OD}=1$ , geometrical thickness is 2 km, cloud top is at 15 km and effective dimension is 32  $\mu\text{m}$ ). Habit sensitivity is much larger in the FIR (about 5 K spread among the curves for different shapes) than in the MIR windows (about 2 K). This is mostly due to a minimum in the imaginary part of the ice refractive index at around 410  $\text{cm}^{-1}$  that imply a minimum in absorption at FIR wavelengths and a relative larger importance of scattering processes that are related to crystal shape. This FIR largest sensitivity is noted to increase with the dryness of the atmosphere and thus amplified when moving towards higher latitudes (not shown here).

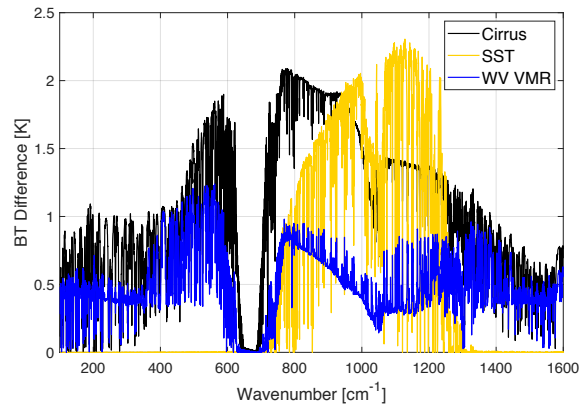

**Figure 2.** Brightness Temperature (BT) sensitivity to a sub-visible cirrus cloud (black line), to a 3 K decrease in surface temperature (yellow line) and to an increase of 10% in water vapor mixing ratio at all levels (blue line). The BT differences are obtained in reference to a Tropical clear sky case over the ocean.

### 3 Cloud Identification and Classification (CIC)

#### 3.1 Algorithm description

CIC is an innovative classification algorithm based on Principal Component Analysis. The methodology relies on a machine learning algorithm that requires the definition of a certain number of training sets equal to the number of classes used for the classification. A descriptive example of the identification process of clear and cloudy cases (*cloud detection*) is first provided in order to facilitate the comprehension of the rigorous mathematical treatment that follows this brief introduction. In Fig. 6 a flowchart of the algorithm is depicted.

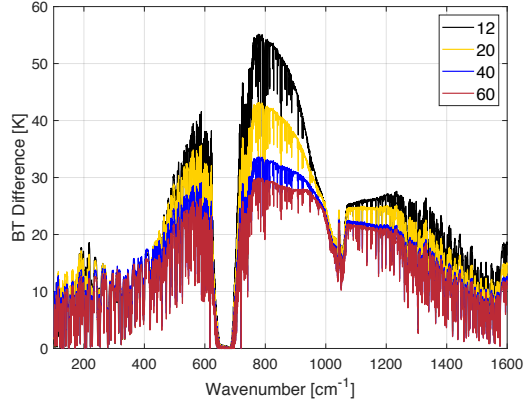

**Figure 3.** Brightness Temperature sensitivity to cirrus cloud particle size distribution effective dimensions. Dimensions values in the legend are in  $\mu m$ . The assumed shape is the plate type, optical depth is 1.5, the cloud thickness is 1 km and cloud top is at 14 km. The BT differences are obtained in reference to a Tropical clear sky case over the ocean.

The first step requires the definition of a *clear sky training set* ( $\mathbf{TR}_{cle}$ ), consisting of a number  $T_{cle}$  of clear sky spectra, and a *cloudy sky training set* ( $\mathbf{TR}_{clo}$ ), consisting of  $T_{clo}$  cloudy sky spectra. For each training set the principal components (PCs) are computed and stored in a matrix. Each spectrum of the test set (one at a time) is then added to the  $\mathbf{TR}_{cle}$  and thus an *extended clear sky training set* ( $\mathbf{ETR}_{cle}$ ) is defined.  $\mathbf{ETR}_{cle}$  is a group of  $T_{cle} + 1$  spectra. The principal components of the  $\mathbf{ETR}_{cle}$  are computed. Supposing that the test set spectrum under consideration is a clear sky spectrum it is expected that the PCs computed for  $\mathbf{ETR}_{cle}$  are very similar to the ones computed for  $\mathbf{TR}_{cle}$  that is to say that the test set element has the same basic features as the elements belonging to the training set (clear in the running example). In this case, it is also expected that the PCs computed for the cloudy sky training set  $\mathbf{TR}_{clo}$  differ from the PCs obtained from the extended cloudy sky training set ( $\mathbf{ETR}_{clo}$ ) that is obtained by adding the spectrum in consideration (that is clear) to the cloudy sky training set.

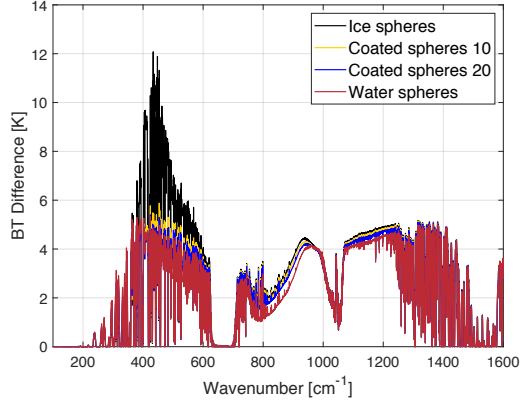

**Figure 4.** Brightness Temperature sensitivity to particles phase. A polar cloud is assumed made of a particle size distribution of spheres of ice (black line), liquid water (red) and two mixed phases. The mixed phase are spheres with an ice core and liquid water coating. The coating is respectively a 10% (yellow line) and a 20% (blue line) in radius of total sphere radius. Cloud optical depth is 7, cloud thickness is 1.5 km and cloud altitude is 5 km. The BT differences are obtained in reference to an Antarctic clear sky case over a snowed surface.

CIC evaluates the variation of the principal components of the training sets due to the addition of a new spectrum (from the test set). The association of a spectrum to a specific class is obtained by evaluating the similarity of PCs of the extended training sets to those of the original training sets: *small* changes in PCs are interpreted as that the spectrum belongs to the class while large changes suggest that the spectrum belongs to a different class. The variations of the PCs obtained for the extended training sets with respect to the original ones are evaluated by means of a new parameter called *similarity index*.  
 5 The notation for similarity indices is:

$$SI(i, j), \quad i \in \{1, 2\}, \quad j \in \{1 \dots J\} \quad (1)$$

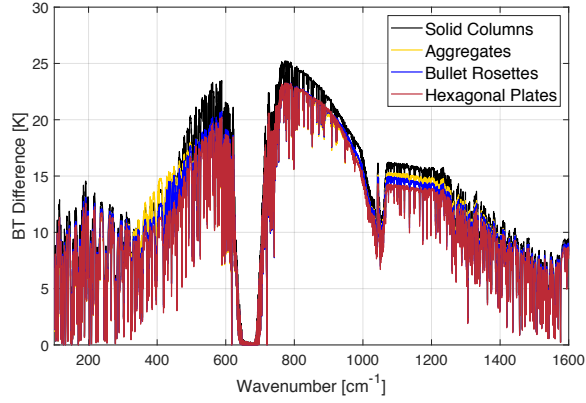

**Figure 5.** Brightness Temperature sensitivity to cirrus cloud crystal habit. The crystal's habits assumed are reported in the legend. The simulated tropical cirrus cloud is 2 km thick, with optical depth 1 and with effective dimension equal to  $32 \mu m$ . The BT differences are obtained in reference to a Tropical clear sky case over the ocean.

where  $i$  is the class label,  $j$  is the test set spectrum label and  $J$  is the number of spectra in the test set to be classified. As an example (that is used in the whole text) it is assumed that the class label is 1 for clear sky spectra and 2 for cloudy sky spectra.

The computation of the similarity indices are now described mathematically. The first step is the definition of the *training set matrices*.

$$\mathbf{TR}_i(\nu, t) \tag{2}$$

$$i \in \{1, 2\}, \quad t \in \{1 \dots T_i\}, \quad \nu \in \{1 \dots \nu_{max}\}$$

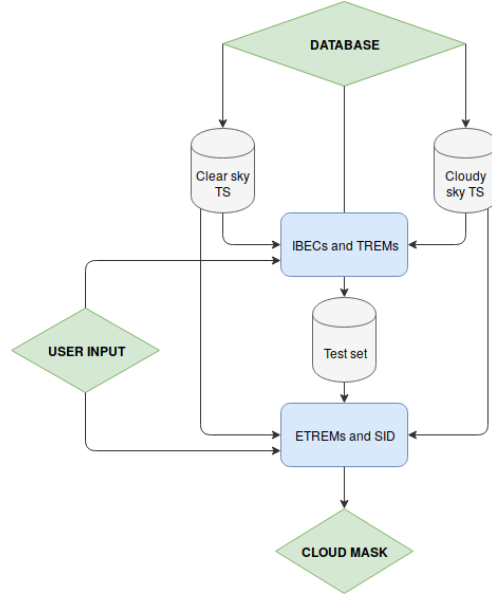

**Figure 6.** Scheme of the dataflow used for the cloud detection process.

where  $t$  is the spectrum index,  $T_i$  is the number of spectra in each training set  $i$ ,  $\nu$  is the wavenumber index that spans from 1 to  $\nu_{max}$  that is the highest wavenumber index.

The second step consists in the computation of the PCs of each training set matrix by evaluating the eigenvectors (eig) of their covariance (cov) matrix:

$$5 \quad \mathbf{TREM}_i(\nu, p) = \text{eig}(\text{cov}(\mathbf{TR}_i(\nu, t))) \quad (3)$$

$$i \in \{1, 2\}, t \in \{1 \dots T_i\}, \nu \in \{1 \dots \nu_{max}\}, p \in \{1 \dots P\}$$

where  $\mathbf{TREM}_i$  is the *training eigenvector matrix*,  $p$  indicates the  $p^{th}$  principal component, and  $P = \max(T_i, \nu_{max})$  is the total number of principal components. Each row of this matrix contains normalised eigenvectors:

$$10 \quad \sum_{\nu=1}^{\nu_{max}} \mathbf{TREM}_i(\nu, p)^2 = 1 \quad (4)$$



Given  $J$  spectra in the test set, a number of  $J$  new matrices is defined for each class. These matrices are simply the concatenation of the *training set matrices* with each single spectrum ( $j$ ) from the test set, and are called *extended training set matrices*. Let

$$\mathbf{TS}(\nu, j), \quad 1 < j < J$$

be the matrix containing all the spectra from the test set. The *extended training set matrices* are defined as follows:

$$5 \quad \mathbf{ETR}_{i,j}(\nu, t') = [\mathbf{TR}_i(\nu, t) \parallel \text{row}_j(\mathbf{TS}(\nu, j))] \quad (5)$$

$$t' \in \{1 \dots T_i + 1\}$$

where the notation  $\parallel$  indicates matrix concatenation. Note that  $\text{row}_j(\mathbf{TS}(\nu, j))$  is a single test set spectrum in a one-dimensional array.

10 CIC evaluates the principal components of the *extended training set*  $\mathbf{ETREM}_{i,j}$  as follows:

$$\mathbf{ETREM}_{i,j}(\nu, p) = \text{eig}(\text{cov}(\mathbf{ETR}_{i,j}(\nu, t))) \quad (6)$$

The training and extended training eigenvector matrices are used to compute the similarity indices (SI) for each test set spectrum ( $j$ ) and for each class ( $i$ ):

$$\begin{aligned} \text{SI}(i, j) = \\ 1 - \frac{1}{2P_o} \sum_{p=1}^{P_o} \sum_{\nu=1}^{\nu_{tot}} |\mathbf{ETREM}_{i,j}(\nu, p)^2 - \mathbf{TREM}_{i,j}(\nu, p)^2| \end{aligned} \quad (7)$$

15 where  $\nu_{tot}$  is the number of features (channels) used for PCA analysis and  $P_o$  is the number of principal components that are associated to the physical signal (real variability) characterizing the spectrum. Using the same weight ( $1/2P_o$ ) for each term of the sum makes the SI very sensible to any spectral signature presents in the spectrum.

The set of optimal principal components ( $P_o$ ) characterizing the signal constitutes the Information BEaring Principal Components (IBECs). The  $P_o$  elements are extracted by minimizing the factor indicator function (IND) defined by Malinowski

20 (2002) and Turner et al. (2006):

$$\text{IND}(p) = \frac{\text{RE}(p)}{(P-p)^2} \quad (8)$$

where  $\text{RE}(p)$  is defined, in Turner et al. (2006), as the *real error*

$$\text{RE}(p) = \sqrt{\frac{\sum_{i=p+1}^P \lambda_i}{T_i(P-p)}} \quad (9)$$

where  $\lambda_i$  is the  $i^{\text{th}}$  eigenvalue of the covariance of some data matrix and  $T_i$  is the number of spectra in the training set  $i$ .

25 The natural number  $P_o$ , obtained through this minimisation process, is the number of eigenvectors associated with the physical signal corresponding to the number of IBECs. In CIC,  $P_o$  is computed separately for both training set matrices ( $i = 1, 2$ ).

Once  $P_o$  is determined the similarity index can be calculated using equation 7. For consistency, the same value of  $P_o$  is used when the  $SI$  computation is applied to the two training sets; the minimum value for  $P_o$  is utilised.

Interpreting the eigenvectors as directions in the multi-dimensional space,  $SI$  is an estimate of how much the principal components of the training set *rotate* after a new spectrum is added to the set. For this reason, similarity indices do not depend on *eigenvalues* but on *eigenvectors*: all the principal components describing the physical signal are accounted for with the same weight in equation 7, since all of them might be important for classification.

Similarity indices defined in this way are normalised. In fact, since the absolute value of the difference between the square loadings of two eigenvectors is at most equal to 2, the sum of  $P_o$  differences can reach the maximum value of  $2P_o$ . And being an absolute value, it turns out that:

$$0 \leq \sum_{p=1}^{P_o} \sum_{\nu=1}^{\nu_{tot}} |\mathbf{ETREM}_{i,j}(\nu,p)^2 - \mathbf{TREM}_i(\nu,p)^2| \leq 2P_o \quad (10)$$

and therefore:

$$0 \leq \mathbf{SI}(i,j) \leq 1 \quad (11)$$

With reference to equation 7, the largest value of the similarity index (1) is obtained for identical  $\mathbf{TREM}$  and  $\mathbf{ETREM}$  matrices meaning that the analysed test set spectrum is not adding any diverse physical information to the training set spectra. An  $SI$  close to zero means that the two matrices are described by very different PCA and the test set element is bringing additional information to the original training set.

A graphical example of the similarity index is provided in Fig 7. The plot shows the  $SI$  computed for cloudy elements of the tropical test set only in the left hand side panel and for clear sky elements only in the right hand side panel. For cloudy sky test set cases, when the  $SI$  is computed using the cloudy training set (orange line) the  $SI$  is very close to one while the  $SI$  values are mostly lower when the clear sky training set is used. Thus, the inequality  $\mathbf{SI}(clo,j) > \mathbf{SI}(cle,j)$  holds for most cloudy sky spectra  $j$ . The situation is reversed when clear sky elements of the test set are used (left panel) showing that highest  $SI$  values are generally obtained when using the clear sky training set (blue line).  $CIC$  exploits results from both the comparisons:  $SI$  computed using the clear sky and the cloudy sky training sets.

## 3.2 Classification

### 3.2.1 Elementary approach

$CIC$  classification requires that each test set element is used for the computation of both similarity indices (one for each training set of the two classes). Once the  $SI$ s for the extended training sets (the one containing cloudy spectra and the one for clear ones) are computed a comparison is performed. Continuing with the running example, when

$$\mathbf{SI}(cle,j) > \mathbf{SI}(clo,j),$$

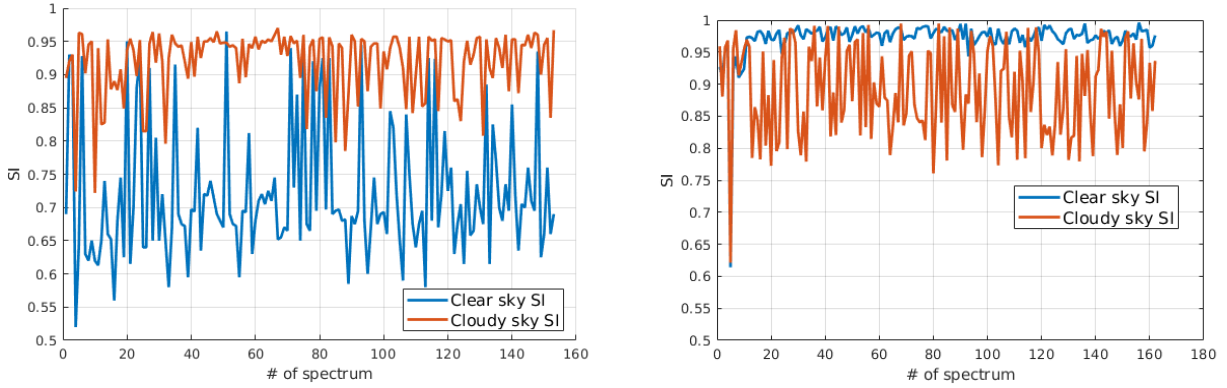

**Figure 7.** Similarity indices computed using tropical cloudy spectra only (left panel) or clear sky spectra only (right panel). In orange the SI is computed using the cloudy sky training set and in blue the clear sky training set. The tropical case is accounted for. The full spectrum is used in the SI computations. Details on the training sets are provided below in the text.

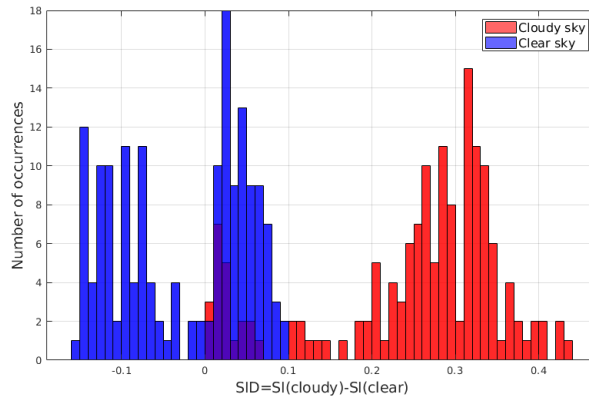

**Figure 8.** SID occurrence distribution for a subset of tropical spectra. The SIDs are computed based on specific (not optimised) training sets. Test set clear sky spectra are in blue, while cloudy sky spectra are in red. Cirrus clouds show very small, positive values of the SID, comparable with values obtained for some clear sky spectra. Class membership of test set spectra is known a-priori since the dataset is synthetic.

then spectrum  $j$  is expected to be clear sky (cle). And of course for:

$$SI(\text{clo}, j) > SI(\text{cle}, j)$$

the spectrum  $j$  is expected to be cloudy (clo).

These two conditions may be unified in a compact index that is defined as the Similarity Index Difference (SID):

$$5 \quad \text{SID}(j) = SI(\text{clo}, j) - SI(\text{cle}, j)$$

and thus if

$$\text{if } \text{SID}(j) > 0, \quad \text{then } j \in \{\text{cloudy spectra}\} \quad (12)$$

$$\text{if } \text{SID}(j) < 0, \quad \text{then } j \in \{\text{clear spectra}\} \quad (13)$$

Spectra classification based only on the SID sign is defined as the *elementary approach*: SID acts as a binary classification parameter. Each spectrum is analysed sequentially and independently from the other elements of the test set under consideration. This elementary approach has the main advantage of being very simple and straightforward, and the disadvantage of being sensitive to the composition of the training sets. In fact, results might be affected (and biased) if one of the training sets is not well populated by spectra that are representatives of the variability within the class. An example of the elementary classification is given in Fig. 8 where the SID distribution for clear and cloudy sky spectra is shown. In the example, the cloudy sky and clear sky training sets are not well characterised (some unbalance is observed) since even if all the cloudy spectra show positive SIDs (as expected), a large number of clear sky spectra has also positive SIDs and thus, those spectra, are potentially misclassified. It is therefore shown that the elementary approach requires an accurate definition of the training sets to work properly.

### 3.2.2 Distributional approach

A *distributional approach* can be adopted for the classification in which the distribution of the SIDs of the training set is analyzed before performing the classification.

A perfect classifier would ideally generate a bimodal SID distribution. Thus the transition from one mode to the other could be associated to a binary classification parameter that changes sign in the transition point. In order to accomplish this task a new index is defined called the *corrected similarity index difference* (CSID).

The elements of the training set (both the clear and cloudy spectra) are used to mathematically define the Corrected SID (CSID), that is simply a shifted SID:

$$\text{CSID}(j) = \text{SID}(j) - \text{shift}_{opt} \quad (14)$$

where  $\text{shift}_{opt}$  is the optimal value of the parameter *shift* that maximises a function that can potentially forecast the performance of the algorithm (a *performance forecasting function*, PFF). This function is called Consistency Index (CoI) and is defined below:

$$\text{CoI}(\text{shift}) = 1 - \max\left(\frac{\text{FP}_{cle}}{T_{cle}}, \frac{\text{FP}_{clo}}{T_{clo}}\right) \quad (15)$$

$$(16)$$

where the clear and cloudy false positives (FP) are counted as:

$$\text{FP}_{cle}(\text{shift}) = \text{card}(\{t \in T_{cle} \mid \text{SID}(j) - \text{shift} > 0\}) \quad (17)$$

$$\text{FP}_{clo}(\text{shift}) = \text{card}(\{t \in T_{clo} \mid \text{SID}(j) - \text{shift} < 0\}) \quad (18)$$

In the above formula, the «card» operator denotes the number of elements of the set, while  $T_{cle}$  and  $T_{clo}$  are the number of clear and cloudy training set elements respectively. The consistency index measures the representativeness of the training sets and in particular it computes how many training set elements would be classified correctly if they were part of the test set. The consistency index is large (close to 1) only if both clear and cloudy false positives (FP in the equations above) are rare, that is  
5 when the training sets are composed of elements that accurately represent the variability within the specific class.

The new CSID parameter operates as the SID parameter: if it is positive, the spectrum is considered cloudy, and if its negative, the spectrum is considered clear. In formulas:

$$\text{if CSID}(j) > 0, \quad \text{then } j \in \{\text{cloudy spectra}\} \quad (19)$$

$$10 \quad \text{if CSID}(j) < 0, \quad \text{then } j \in \{\text{clear spectra}\} \quad (20)$$

The use of the distributional approach significantly improves the performance of the algorithm as it will be shown later in the text.

### 3.3 Unclassified spectra

Each element of the test set is classified in accordance with the sign of the classifier (SID or CSID). For practical purposes,  
15 it can be useful to define some thresholds or limits that determine a set of «unclassified» elements characterised by values of the classifier belonging to a limited interval around 0 (that is the ideal point separating the two modes of the distribution). The simplest way to set this interval is to let the user to define two parameters:  $\Theta_1$  (positive) and  $\Theta_2$  (negative), representing the inner limits of a confidence interval. Any spectrum whose classifier is such that falls within the interval  $[\Theta_2, \Theta_1]$  is considered «unclassified». The  $\Theta_2$  and  $\Theta_1$  parameters should be defined in accordance with the experimental conditions and sensor  
20 performances and their quantification is beyond the scope of this work. For this reason and since we rely on a synthetic test set all the classifications performed will be binary that is each element is classified either clear or cloudy.

### 3.4 Scores

There is no unique metric to define the performances of a cloud classification algorithm since their assessment is linked to the goal of the study. For this reason, the set of parameters (i.e. scores) used to evaluate the algorithm performance in this section are  
25 somewhat arbitrary. As a general rule, any metric should measure a better performance if more spectra are classified correctly. In this regard, an element of the test set that undergoes a classification process falls into one of the following categories:

1. *True Positive, TP*: the element is a class  $i$  member, and is correctly classified.
2. *False Positive, FP*: the element is not a class  $i$  member, but it is classified as belonging to class  $i$ .
3. *False Negative, FN*: the element is a class  $i$  member, but is not correctly classified as such.
- 30 4. *True Negative, TN*: the element is not a class  $i$  member, and it is not classified as belonging to class  $i$ .

It is possible to define the classification performance using two or more of these sets.

A possible definition of performance is provided by the *a-priori* classification score, here called PRISCO:

$$\text{PRISCO}(i) = \frac{\text{TP}(i)}{\text{TP}(i) + \text{FP}(i)} \quad (21)$$

- 5 Where  $\text{TP}(i)$  is the number of class  $i$  true positives and  $\text{FP}(i)$  is the number of class  $i$  false positives. The PRISCO is known as *hit rate* in the literature (see Wilks (2006)). This score ranges between 0 and 1. It is maximised for  $\text{FP}(i) = 0$ , occurring when all the spectra classified by the algorithm as class  $i$  are actually belonging to class  $i$ .

This score can be viewed as an *a priori probability*, i.e. the likelihood that a spectrum *labelled* as a member of class  $i$  actually belongs to class  $i$ :

$$\text{PRISCO}(i) = \text{P}(L(i)|B(i)) \quad (22)$$

where  $L(i) = \frac{\text{TP}(i)+\text{FP}(i)}{\text{CTE}}$  is the fraction of spectra *labelled* as class  $i$ , and  $B(i) = \frac{\text{TP}(i)+\text{FN}(i)}{\text{CTE}}$  is the fraction of spectra *belonging* to class  $i$ . The variable CTE represents the number of elements of the test set.

- 15 The *a-posteriori* probability, i.e. the likelihood that a spectrum belonging to class  $i$  is correctly classified by the algorithm, is defined by the classification score here called POSCO:

$$\text{POSCO}(i) = \frac{\text{TP}(i)}{\text{TP}(i) + \text{FN}(i)} = \text{P}(B(i)|L(i)) \quad (23)$$

where  $\text{FN}(i)$  is the number of class  $i$  false negatives. This score is useful to estimate the percentage of correctly classified spectra per each class: in fact, the sum of class  $i$  true positives and false negatives ( $\text{TP}(i) + \text{FN}(i)$ ) is equal to the total number of class  $i$  spectra.

The two scores are complementary and are related by the equation:

$$\text{POSCO}(i)B(i) = \text{PRISCO}(i)L(i) \quad (24)$$

In this paper, detection performance (DP) is defined as the minimum value out of the two PRISCO scores relative to the classes under examination:

$$\text{DP} = \min(\text{PRISCO}(\text{class 1}), \text{PRISCO}(\text{class 2})) \quad (25)$$

where:

$$0 \leq \text{DP} \leq 1 \quad (26)$$

The PRISCO is preferred to POSCO since no a-priori assumption can be made about class membership when classification is performed on real data. In the definition of the detection performance the minimum PRISCO value is chosen because the classification performance is considered high only if hit rates for both classes are high.

## 5 4 Results

In this section the performance of the CIC cloud detection algorithm is evaluated for multiple atmospheric conditions. The additional information content of the FIR part of the spectrum is also studied. Classifications are performed both by using the mid infrared (MIR) channels only or by using channels spanning over the full FORUM spectrum (FIR+MIR).

A first result is anticipated in Fig. 9; the details of the computations will be described in the next paragraph. Multiple couples of training sets (clear and cloudy), 100 elements in total for each couple, are used to perform a classification applied to the simulations for the tropical case. For each training set (60 in the example) CIC is applied, the Consistency Index and the detection performance are computed and plotted as scatter plots. This allows to relate the final classification scores (evaluated by DP) with the composition of the training set (whose characterisation is associated to the CoI). The CIC algorithm is run using both the MIR only or the full spectrum: 129 channel in the FIR and 129 in the MIR. The selected channels range in the  $[371.1 - 1300] \text{ cm}^{-1}$  interval and are selected with a fixed sampling except for a small interval at around the  $667 \text{ cm}^{-1}$   $\nu_2$  vibrational  $\text{CO}_2$  band that is not used. Results show that the scores (indicated by DP) are generally larger when the full spectrum is exploited. In fact, it is computed that the average values of the DP move from 0,60 to 0.79 (for the elementary approach, left panel in the figure) and from 0.67 to 0.86 (for the distributional approach, right panel in the figure) when using features from the full FORUM spectra instead that those from the MIR only.

These preliminary computations suggest the following:

1. better results are obtained for the distributional approach (right panel) with respect to the elementary one (left panel)
2. a correlation between the CoI and the DP exists.

The points above are taken into account in order to maximise the performances of the CIC algorithm when applied to a test set. In particular, it is suggested that the distributional approach is preferred over the elementary one and that an optimal training set can be arranged before the classification is actually performed since CoI is computed for training set elements.

Thus, a strategy for the application of CIC to the synthetic dataset is defined and the evaluation of the information content in the FIR is planned:

- A REference Training Set (called RETS and consisting of a clear and a cloudy training set) is defined using an optimisation methodology based on the CoI values. The RETS is used as a reference to perform test set classification with a variable number of features.
- The performance of the algorithm is studied when using features from the MIR only or when exploiting also an increasing number of FIR channels up to cover the full FORUM spectrum.

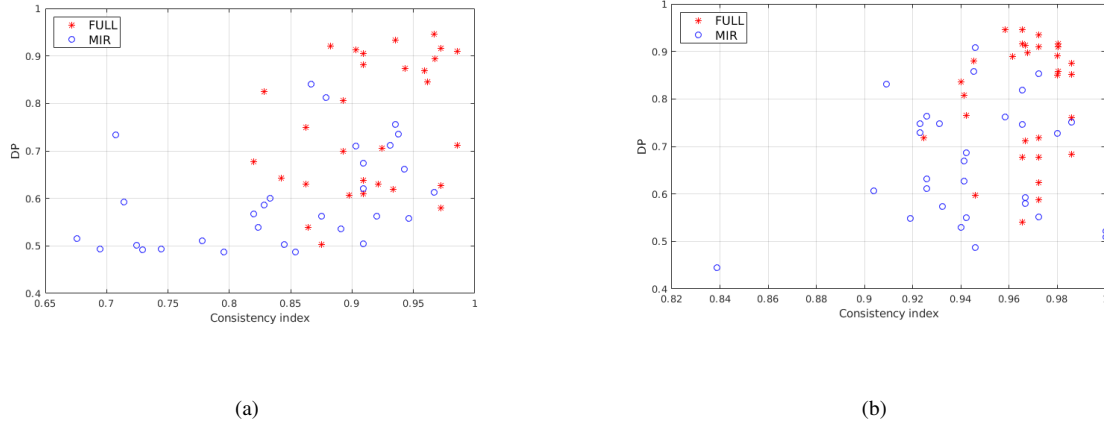

**Figure 9.** Scatter plots relating the consistency index (CoI) and detection performance (DP) for multiple tropical training set couples (clear and cloudy). CIC results are shown for both the elementary (left panel) and the distributional approach (right panel). Blue circles represent classification results obtained using features in the MIR only, while red stars represent classification results exploiting the full spectrum.

#### 4.1 REference Training Set (RETS)

In this paragraph, a strategy for the definition of an optimised training set, *RETS*, (intended as a set of clear and a set of cloudy spectra) is outlined. The optimisation applies when the training set elements are randomly chosen from a large subset of the whole dataset. Results could be different if training set elements are manually selected in order to cover the natural variability of the cloud and clear sky spectra encountered for each latitudinal belt and season.

The strategy is based on the correlation between CoI and the CIC performances (measured by the DP parameter). As said, the CoI measures how well the training set elements would be classified if they were part of the test set.

For simplicity, only the CIC applications to the tropical data set are reported in this section but the same process is applied to Mid Latitudes and Polar cases also (not shown). The Tropical dataset includes 352 clear sky and 817 cloudy sky spectra, for a total of 1169 spectra. Out of these, 315 are used as test set. The other spectra are exploited to define multiple training sets: 100 elements at a time for each training set couple (clear and cloudy). This strategy is followed in order to have multiple training sets with different combinations of spectra. Of course the optimisation process is particularly important when the spectra that need to be classified are many. The operation is also important in reducing computational cost (see Subsection 4.4). In fact, the TREM matrices and the SID distribution of the optimised training set can be saved in a file, reducing the running time of both the elementary and the distributional approach.



The training set elements (100 per each training set couple) are randomly chosen from a set of 854 simulations in clear and cloudy sky, but with a constraint on the number of clear and cloudy components. Three different Training set Number Configurations (TraNCs) are used:

$$T_{cle}(1) = 70, T_{clo}(1) = 30 \quad (27)$$

$$5 \quad T_{cle}(2) = 50, T_{clo}(2) = 50 \quad (28)$$

$$T_{cle}(3) = 30, T_{clo}(3) = 70 \quad (29)$$

Twenty different training sets are constructed for each TraNC. Both an elementary and a distributional-approach-based classification are provided for each training set.

10 CIC is run on the test set elements and a binary classification (each element is classified clear or cloudy) is performed by exploiting the full spectrum. The scores (and DP) are computed. The results are presented in Fig. 10 where the DP is plotted as a function of the CoI.

On average, the most accurate performances are obtained for TraNCs in which  $T_{cle}$  is larger than  $T_{clo}$ . The worst results are  
15 obtained for  $T_{clo}$  greater than  $T_{cle}$ . The average DP values for the three groups of TraNCs are reported in the plots of the figure.

Fig. 10 shows that a correlation exists between the DP and CoI in the sense that, on average, large values of DP are obtained for large values of CoI. It is also shown that, on average, the DP computed using the distributional approach is larger than for results obtained using an elementary approach.

This correlation is significant because it is observed even when CIC computes these two parameters totally independently,  
20 i.e., when the elementary approach is followed. For this reason the CoI can be used as a *performance forecasting parameter*, that is, a parameter estimating the quality of the classification. Nevertheless a quantification of the performances cannot be provided a-priori of the application of the algorithm since it also depends on the spectra of the test set to be analysed.

If a positive correlation between the DP and the CoI is assumed to exist, then the best performances are expected for training  
25 sets with the highest CoIs. For this reason, the RETS is defined as the training set with the highest CoI among those considered. In our case, the best performing training set is composed of 70 clear sky and 30 cloudy sky spectra.

The above configuration is selected as the tropical RETS to be used in the analysis shown in the next paragraphs. Similarly  
30 RETS for the mid and the polar latitudes are constructed. The RETS for clear sky consists of a set of spectra able to catch the seasonal (and thermal) variability reported in the synthetic dataset which is created to reproduce global conditions for all the four seasons.

The cloud ODs accounted for in the cloudy RETS for Tropics range from 0.05 to 21.8, while the test set ones range from 0.02 to 23; the RETS's ice cloud top heights range from 9 to 16 km and in the test set they span from 4 to 16 km. A summary of the clouds OD used in the RETS, for the Tropical case, is reported in Table 4. It is shown that a large number of elements consists

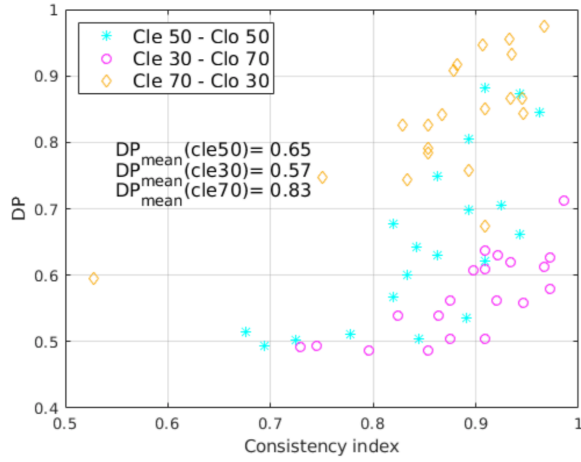

(a)

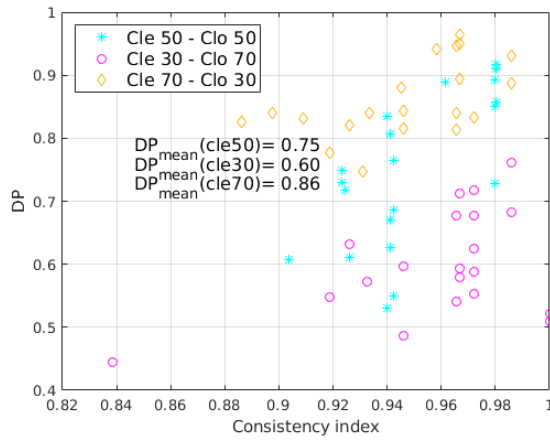

(b)

**Figure 10.** Scatter plot of DP and CoI for multiple training sets (grouped in 3 TraNC reported in the legend). Results are shown when using both the elementary approach (upper panel) and the distributional approach (lower panel). For each group an average value of the DP is computed and reported in the plot.

of optically thin clouds. This choice was performed in order to challenge the CIC capabilities to detect clouds in very difficult conditions.

#### 4.2 Evaluation of FIR contribution to cloud identification

Multiple classifications, using a variable number of features (FORUM channels), and accounting both for the full spectrum and the MIR only are performed. The classifications account for a fixed number of MIR channels, while the number of FIR chan-

**Table 4.** Number of cloudy spectra, as a function of cloud OD interval, for elements belonging to the cloudy set of the RETS and to the test set, Tropical case. In the second column, in parenthesis, it is reported the percentage value with respect to the total number of elements in the test set for the same OD interval.

| Training and test set cloud ODs |           |          |
|---------------------------------|-----------|----------|
| Range                           | RETS      | Test set |
| $OD \leq 0.1$                   | 8 (6.3%)  | 126      |
| $0.1 < OD \leq 0.5$             | 3 (2.3%)  | 131      |
| $0.5 < OD \leq 1$               | 1 (5.3%)  | 19       |
| $1 < OD \leq 3$                 | 14 (4.5%) | 308      |
| $3 < OD \leq 10$                | 0 (0%)    | 21       |
| $OD > 10$                       | 4 (6.8%)  | 59       |
| Total                           | 30 (4.5%) | 664      |

nels is changing to assess if the FIR part of the spectrum is capable to bring additional information content that significantly improves the algorithm's performances.

In order to speed up calculation and to avoid channels with a low signal to noise ratio, the chosen MIR wavenumbers only range from 667 to 1300  $\text{cm}^{-1}$ , while the FIR ranges from 100 to 640  $\text{cm}^{-1}$ . Thus the full spectrum spans over the 100-1300  $\text{cm}^{-1}$  spectral range with the exception of a limited wavenumber interval in the  $\nu_2$   $\text{CO}_2$  band centred at around 667  $\text{cm}^{-1}$ .

Channels are selected by using a constant sampling with no optimisation criterium applied. The number of selected channels in the FIR is defined by the following formula:

$$N_{feat} = \text{floor}(8 \cdot 2^{\frac{n}{2}}) + 1, \quad n \in 1 \dots 10 \quad (30)$$

$$10 \quad (31)$$

In this way,  $N_{feat}$  spans over two orders of magnitude.

In Table 5 the number of features used in the FIR is reported. The upper (starting) channel in the FIR is at 639.9  $\text{cm}^{-1}$  and the other FIR channels are sampled toward smaller wavenumbers every 2.1  $\text{cm}^{-1}$ . Thus the data reported in the table should be interpreted as follows: 12 channels means that 12 channels between 639.9 and 616.8  $\text{cm}^{-1}$  are accounted for, and so on with the other larger number of channels up to cover the full FIR part of the spectrum.

In Fig. 11, the results obtained for 11 different classifications are shown in terms of detection performance. DP is plotted as a function of the number of FIR features used in the classification applied to the tropical case. At the value 0, of the x-axis of the figure, the MIR part of the spectrum only is accounted for (256 channels in this case), while in the other 10 cases the FIR part of the spectrum also is exploited with an increasing number of channels indicated by the x-axis values.

**Table 5.** Lowest wavenumber as a function of the number of FIR channels. The sampling rate is constant and set equal to  $2.1 \text{ cm}^{-1}$ . The highest FIR wavenumber is equal to  $639.9 \text{ cm}^{-1}$ .

| number of FIR channels | Lowest channel ( $\text{cm}^{-1}$ ) |
|------------------------|-------------------------------------|
| 12                     | 616.8                               |
| 17                     | 606.3                               |
| 23                     | 593.7                               |
| 33                     | 572.7                               |
| 46                     | 545.4                               |
| 65                     | 505.5                               |
| 91                     | 450.9                               |
| 129                    | 371.1                               |
| 182                    | 259.8                               |
| 257                    | 102.3                               |

Results show that performance gradually improves for increasing number of FIR channels. In particular, there is a slight decrease in performance after adding the 12 channels closest to the  $\text{CO}_2 \nu_2$  band centre which are mostly insensible to cloud parameters due to strong absorption of the carbon dioxide. The decrease is gradually offset by improvements obtained when channels in the  $[238.8 - 545.4] \text{ cm}^{-1}$  wavenumber range are added. The DP slightly decreases if channels in the  $[102.3 - 238.8]$   $\text{cm}^{-1}$  range are included probably due to a reduced radiance sensitivity to surface and cloud features at those wavenumbers.

In the classifications, both the *distributional approach* (black line in the figure) and the *elementary approach* (red line) are followed. For the Tropical case, the elementary and distributional approach provide DPs as high as 0.9. Note that both methodologies take advantage of the optimised selection of the RETS and that the information content critical for DP improvements derives from channels spanning the  $[238.8 - 545.4] \text{ cm}^{-1}$  range.

10

In Fig. 12 the cloud detection of the Tropical test set is plotted to function of the CSID value and cloud optical depth. Two classifications are performed: one using the MIR (left panel of the figure) and another using the full spectrum (right panel). The number of MIR channels used in the process is kept the same (128) for both configurations. The considered FIR channels, when using the full spectrum, are 129 and span from  $371.1$  to  $639.9 \text{ cm}^{-1}$ . For visual purposes the plotted clear sky test set elements are associated to  $\text{OD}=10^{-8}$ , while all the other OD values are for cloudy sky. Results shown in Fig. 12 are obtained using the RETS.

True positives (correct classification) for clear and cloudy spectra are respectively orange circles and red asterisks. False positives are blue circle for clear and green asterisks for clouds. The left plot of the figure shows that the number of misclassified cloudy spectra grows for decreasing optical depth when using the MIR only. Clear sky case are all well classified in this configuration. If CIC is run exploiting the full spectrum (right panel of the figure) the overall detection performance is enhanced

20

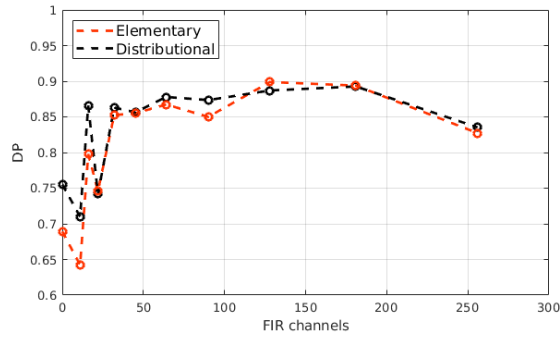

**Figure 11.** CIC cloud detection performance as a function of the number of FIR features (channels) for the Tropical case. 256 MIR channels are used. The black and red dots indicate the distributional and elementary approach respectively.

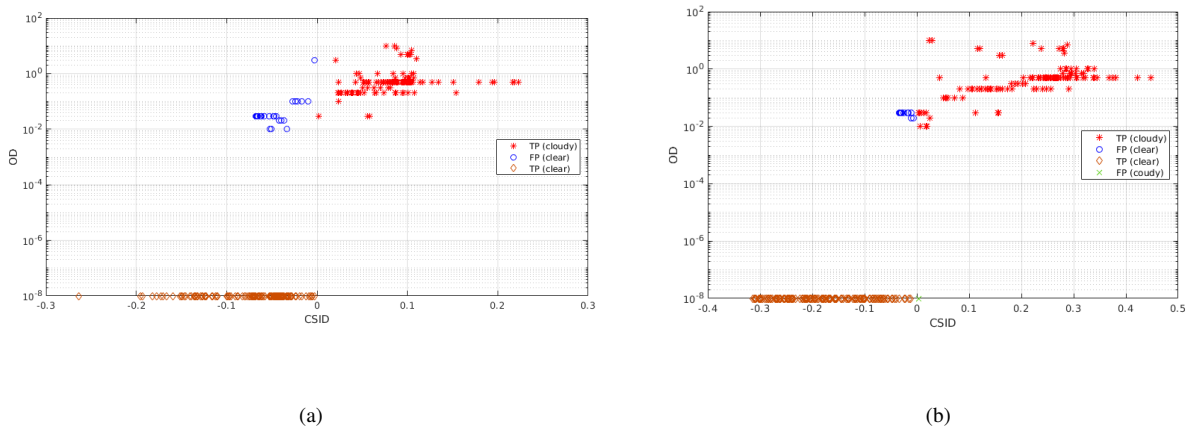

**Figure 12.** Classification of the Tropical test set as a function of the optical depth of the elements (a value of  $10^{-8}$  is used to plot the clear sky cases). Data are plotted as a function of the corrected similarity index difference (CSID) and cloud optical depth (OD). Left panel: CIC is run using 128 MIR channels. Right panel: CIC is run using the 128 MIR and 129 FIR channels. For both cases the *distributional* approach is assumed. Color codes are reported in the legend.

even if a clear sky case is misclassified (green x). Nevertheless, most cirrus clouds are now correctly classified, with the exception of only few cases with optical depth less than 0.5. Note that the DP value is the minimum between the hit rate computed for cloudy sky cases and clear sky cases (see equation 25) and thus is indicative of the CIC ability to correctly classify either clear and cloudy spectra.

**Table 6.** MIDWIN, POLWIN, and POLSUM data set. For clear and cloudy condition the table columns report the total number of simulations (spectra), the number of spectra used to define the training sets and the number of cases used as test sets.

|                   | MIDWIN | POLWIN | POLSUM |
|-------------------|--------|--------|--------|
| Clear             | 305    | 244    | 248    |
| Train. Set clear  | 205    | 164    | 168    |
| Test S. clear     | 100    | 80     | 80     |
| Cloudy            | 405    | 284    | 248    |
| Train. Set cloudy | 177    | 174    | 201    |
| Test S. cloudy    | 228    | 110    | 47     |

### 4.3 Mid Latitudes and Polar regions

The CIC code is applied to the Mid Latitudes and Polar datasets to test the algorithm performances in different atmospheric conditions. The results obtained using the MIR only and using the full spectrum are again compared. Since detection performances are dependent on the analysed datasets (test sets) the results cannot be interpreted in absolute sense, but in reference to the configuration parameters.

Mid Latitude winter (MIDWIN), Polar winter (POLWIN) and Polar summer (POLSUM) cases are presented. The TraNCs used are generated with the same methodology outlined for the Tropical case thus they are composed of 70 clear sky spectra and 30 cloudy sky spectra randomly chosen from a large subset of the full dataset. Spectra used to define the training sets are not inserted in the test set. In Table 6 a summary of the total number of clear and cloudy spectra for each case study is provided. In the table the number of clear and cloudy simulations used for defining the training sets and for the test sets is also reported.

The capability to extract information content from the FIR is evaluated by applying the same procedure as before (see Sections 4.1 and 4.2).

Classification results obtained using 60 different training sets are shown in Fig. 13 for the 3 considered cases (MIDWIN, POLWIN and POLSUM respectively from the upper to the lower panel). Only results using the distributional approach are presented since CIC, on average, produces higher scores when run in this configuration.

It is shown that the classification scores increase by adding FIR channels to the MIR ones: average DP values are reported in the plots. However, the correlation between CoI and DP is less significant for the present cases with respect to what was found for the simulations in the Tropics. Also the DPs obtained for the MIDWIN, POLWIN, and POLSUM cases are lower than the ones obtained for the Tropical case. This result might be caused by the mean larger temperature differences between high tropical cirrus clouds and the surface with respect to what found for Mid Latitude and Polar cases. It should be also considered that the Polar regions (especially in winter season) present surface features (ice and snow on the ground) that have radiative properties similar to ice clouds and thus making the clear/cloud identification extremely challenging in particular

when analysing a test set containing a large number of thin cirrus clouds as the one under consideration.

The POLSUM case (lower panel in Fig. 13) show an evident correlation between the DP and CoI when the full spectrum is accounted for. Moreover, in this case, DP values are on average larger than 0.7 when CoI are larger than 0.85. Therefore a  
5 RETS is chosen for this case to be used in testing the ability of CIC to correctly classify clouds with different optical depths. In Fig. 14 all the cloudy cases present in the POLSUM test set are classified using features in the MIR only or from the full FORUM spectrum. Results of the classification are plotted as a function of the CSID and of the cloud optical depth. It is noted that the majority of the cloudy cases (also for optically thick clouds) are missed by CIC when relying on MIR channels only (left panel of Fig. 14). The scores improve significantly when the full spectrum is accounted for (right panel of the same figure).  
10 Nevertheless, optically thin clouds (mostly sub-visible cirrus clouds whose  $OD < 0.03$ ) are still misclassified. The misclassified cases do not show any relation with the type of polar surfaces accounted for in the simulations (fine snow, medium snow, coarse snow or ice).

#### 4.4 Computational time

15 In this section, a study of the computational time required to calculate the CoI is performed. The CoI computational time is a good indicator of the speed of the core algorithm, since its computation requires the SI computation of all training set elements and the additional optimisation needed for the distributional approach. Moreover, the CIC classification subroutine is the only core routine whose duration depends on the number of features used for the classification. The current version of CIC algorithm is implemented in MATLAB programming language (<https://www.mathworks.com/products/matlab.html>).  
20 When the elementary approach is selected the CoI computation is not necessary. For this reason, the sensitivity study made in this section can also be interpreted as a study of the distributional approach computational cost and results represent an upper limit of the computational time for a classification process in any configuration.

In the upper panel of Fig. 15 results concerning the computational time of CoI as a function of the number of features ( $N_{feat}$ )  
25 and of the number of training set elements (here indicated with  $T_{tot} = T_{clear} + T_{cloudy}$ ) are reported. Times are referred to computations performed on a machine with processor Intel i5 (4 cores) and 4GB RAM. It is shown that the computational time increases non-linearly with  $N_{feat}$ .

The algorithms for solving linear algebra problems cannot have a linear time complexity (computational complexity describing the time to run the algorithm). Raz (2003), shows than a lower bound for time complexity of matrix multiplication  
30 is  $\mathcal{O}(n^2 \log(n))$  and Demmel et al. (2007)) demonstrated that the same time complexity bound applies to most other linear algebra problems, including eigenvector computation, as performed by CIC.

CoI computation consists of three main subroutines: factor indicator function computation and its minimisation (see Eq. 8), the SI computation (see Eq. 7), and  $shift_{opt}$  determination (Eq. 18). Among the three, the computational cost of the SI is the

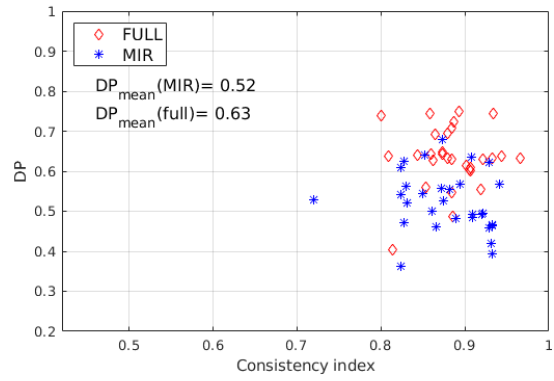

(a)

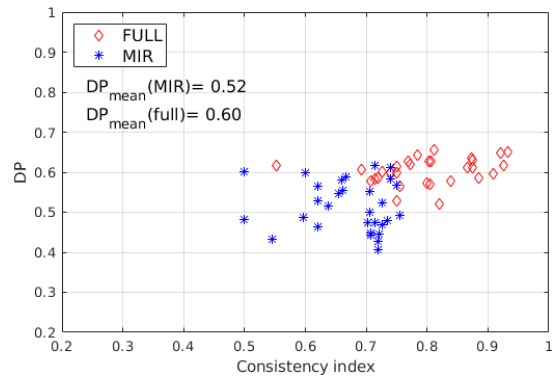

(b)

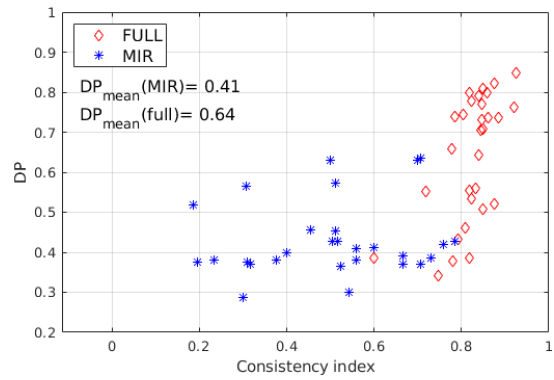

(c)

**Figure 13.** Clear/cloud classification DP using the distributional approach for the MIDWIN case (upper panel), the POLWIN case (middle panel) and POLSUM (lower panel). Data are plotted as function of CoI and 60 TraNC are used for each case.



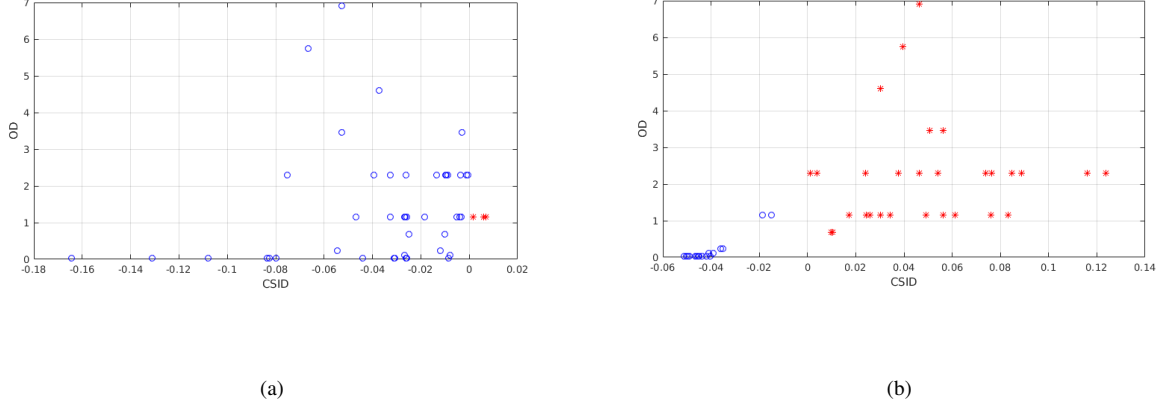

**Figure 14.** Correctly classified (red asterisks) and misclassified (blue circles) cloudy sky spectra from the Polar Summer (POLSUM) test set. Data are plotted as a function of the corrected similarity index difference (CSID) and cloud optical depth (OD) and the distributional approach is considered. In the left panel only the MIR features are accounted for while on the right panel the full spectrum is exploited in the classification.

highest, since the other two only perform a limited and fixed number of cycles involving simple arithmetic operations. This subroutine computes the similarity indices for all  $T_{tot}$  training set elements. SI computation requires the costly calculation of the TREM matrices (see Eq. 3). TREM matrices need covariance computation, whose time complexity is  $\Omega(N_{feat}T_{tot}^2)$ , and eigenvector computation, whose time complexity is  $\Omega(T_{tot}^3)$ . Therefore, SI computation has an approximate time complexity of

5  $\Omega(N_{feat}^2T_{tot}^2 + N_{feat}T_{tot}^3)$ . The results of the computation of the SI parameter as a function of  $T_{tot}$  and for different numbers of  $N_{feat}$  are reported in the lower panel of Fig. 15.

The running time of the remaining two routines (the one that computes the indicator function minimisation and the one that finds the  $shift_{opt}$  parameter) is very limited and less than 0.3 seconds for any of the configurations accounted for  $N_{feat}$  and

10  $T_{tot}$ .

Note that the Fourier Transform Spectrometer of the FORUM mission will perform one measurement about every 12 seconds (as stated in the FORUM Proposal for Earth Explorer Mission EE-9 'Fast Track' Earth Observation Envelope Programme June 2017) and thus the CIC algorithm could be run operatively on mission data.

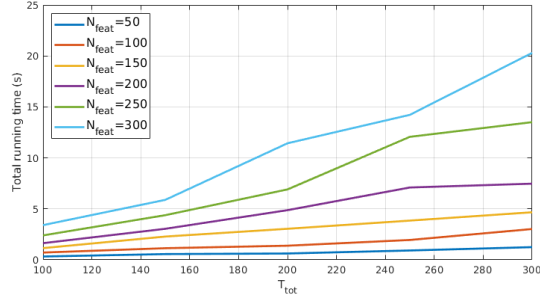

(a)

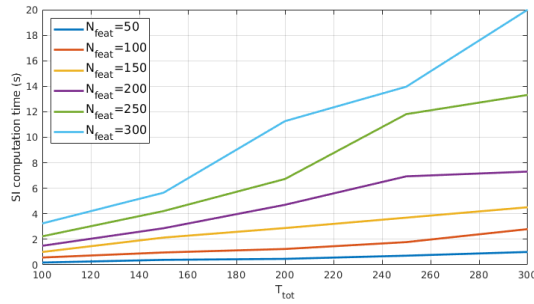

(b)

**Figure 15.** CoI coputational time (upper panel pane) and SI computational time (lower panel) as functions of training set size ( $T_{tot}$ ) and of the number of features used ( $N_{feat}$ ). A non-linear relationship between the variables is observed.

## 5 Conclusions

A new methodology for cloud spectra detection and classification (named CIC: Cloud Identification and Classification) is presented. CIC is a very fast machine learning algorithm based on principle component analysis that depends on a limited number of user defined free parameters.

- The algorithm exploits a training set composed of two groups of spectra (each group is a class). The training set elements should represent the observed variability within the classes and thus should include a sufficient number of spectra capable to characterise the radiative features encountered in the area of study. At the same time, they should be 'sensitive' to the addition of new elements with spectral characteristics that are not present in the training set groups. Typically a total number of 100

spectra is sufficient to well characterise the clear sky and cloudy sky training set groups for each latitudinal belt (Tropics, Mid Latitudes, poles) and season. Mathematically the algorithm evaluates the similarity of each test set spectrum with each class and thus provides a classification. CIC, firstly, computes the eigenvectors of the covariance matrix of each training set class. Secondly a test set element is analysed by adding it to each training group (the clear and cloudy sky). The new eigenvectors of the extended covariance matrix (formed by the training set elements of one class plus the test set element) are computed. An index of similarity is derived for the test set spectrum with respect to the two groups of the training set. It is assumed that a clear sky spectrum, added to the set of spectra defining the clear sky training set, does not significantly modify the group's principal components while some significant modifications will be detected if the clear sky spectrum is added to the cloudy sky training set. Viceversa is for a cloudy sky spectrum of the test set. Similarity indexes are thus defined to quantify the modification of the principal components of the training set when a new element (of the test set) is added. Based on these indexes the element is associated to one of the two considered classes.

CIC can be run by adopting two approaches: the *elementary* and the *distributional* one. The first one is more intuitive and straightforward: the classification for each test set spectrum is done by comparing the similarity indexes computed with the two classes of the training set. The second one requires an additional a-priori optimisation process, at very low computational extra cost (Subsection 4.4). The optimisation is based on the definition of the Consistency Index (CoI) that is related to the detection performance of the algorithm applied to the training set itself. Therefore, if the training set represents natural variability sufficiently well, the CoI serves as a performance forecaster. When optimisation is applied higher scores are obtained, as measured by the increased detection performance (DP, see Section 4) parameter that can reach values as high as 0.95.

The CIC is tested against a large synthetic dataset computed to simulate high spectral resolution radiance from satellite, specifically as possibly observed by the Earth Explorer Fast Track 9 candidate mission FORUM (Far Infrared Outgoing Radiation Understanding and Monitoring). The measured FORUM radiance covers the 100-1600  $cm^{-1}$  spectral bands (thus including the under-explored far infrared part of the spectrum) with a nominal spectral resolution of 0.3  $cm^{-1}$  and a goal noise of 0.4  $mW/(m^2sr cm^{-1})$  in the 200-800  $cm^{-1}$  interval and 1  $mW/(m^2sr cm^{-1})$  outside. The simulations are performed by using multiple surface properties, atmospheric profiles and different cloud features for liquid, mixed phase and ice clouds (including multiple ice habits). Simulations show that the far infrared part of the spectrum is particularly sensitive to many atmospheric parameters, such as upper tropospheric temperature and water vapour and to cloud geometrical and microphysical properties.

The dataset is divided in subsets in accordance with the latitudinal belt (and season for the Mid Latitudes) and the CIC is applied by accounting for different configurations. Results show that the CoI can be used to optimise the training set and that, statistically, the distributional approach is better performing than the elementary one. The code is also used to assess the additional information content derived from the analysis of the far infrared part of the spectrum with respect to the mid infrared only. In this regards it is shown that the overall detection performances increase when the radiance spectra in the far infrared are accounted for. In particular, the radiance exiting the 238-545  $cm^{-1}$  is improving the cirrus detection performances in almost all the atmospheric conditions (latitudinal belt and season). Very thin cirrus clouds (i.e. sub visible cirrus) are better detected when exploiting the full FORUM spectrum than the mid infrared part of the spectrum only. The hit scores for cirrus clouds with

optical depth less than 0.06 moves from about 25% when using the mid infrared only to about 60% when exploiting also the FIR part of the spectrum. It is shown that, in tropical regions, the overall detection performances exploiting the full spectrum can be very high (higher than 0.9 for the present dataset that is very challenging for the large presence of sub visible cirri) when the appropriate training set is selected. It is finally noted that clear/cloud spectra identification performances decrease when moving from Tropics to Poles mostly due to the decreased sensitivity of cloudy spectra because of the colder atmospheric and surface temperatures and the increased similarities in the surface and cloud radiative properties.

In the present work, CIC functionalities are illustrated for cloud detection application in presence of high spectral resolution far and mid infrared radiance observations. Nevertheless, the same algorithm can, in principle, be implemented to work with different kind of data (i.e low spectral resolution data) and also to perform sub-classifications, such as cloud phase identification. The CIC algorithm is easily adaptable to different viewing geometries and diverse high spectral resolution sensors. Currently, it is being tested against interferometric data in the far and mid infrared part of the spectrum collected by the airborne Tropospheric Airborne Fourier Transform Spectrometer (TAFTS, Canas et al. (1997)) and the Airborne Research Interferometer Evaluation System (ARIES, Wilson et al. (1999)) during the 2015 CIRCCREX (Cirrus Coupled Cloud-Radiation Experiment) campaign (Pickering et al., 2015) and to ground based data collected by the REFIR-PAD interferometer since 2012 from the Dome-Concordia station on the Antarctic Plateau (<http://refir.fi.ino.it/refir-pad-domeC>).

*Code and data availability.* The CIC source code version used in the present paper is available on request to Sbrolli Iacopo who is the software developer of the algorithm. Advanced versions of the code are available on request to the corresponding author.

*Competing interests.* The authors declare that they have no conflict of interest.

*Acknowledgements.* The present work is in preparation of the FORUM mission. FORUM related studies are supported by projects of the Italian Space Agency (ASI) and of the European Space Agency (ESA).

## References

- Adhikari, L., Whang, Z., and Deng, M.: Seasonal variations of Antarctic clouds observed by CloudSat and CALIPSO satellites, *J GEOPHYS RES-ATMOS*, 117, 2012.
- Ahmad, A.: Cloud Masking for Remotely Sensed Data Using Spectral and Principal Components Analysis, *Engineering, Technology and Applied Science Research*, 2, 221–225, 2012.
- Amato, U., Lavanant, L., Liuzzi, G., Masiello, G., Serio, C., Stuhlmann, R., and Tjemkes, S. A.: Cloud mask via cumulative discriminant analysis applied to satellite infrared observations: Scientific basis and initial evaluation, *ATMOS MEAS TECH*, 7, 3355–3372, 2014.
- Bozzo, A., Maestri, T., and Rizzi, R.: Combining visible and infrared radiometry and lidar data to test simulations in clear and ice cloud conditions, *ATMOS CHEM PHYS*, 10, 7369–7387, 2010.
- Bromwich, D., Nicolas, J., M Hines, K., Kay, J., L Key, E., Lazzara, M., Lubin, D., Mcfarquhar, G., Gorodetskaya, I., Grosvenor, D., Lachlan-Cope, T., and Lipzig, N.: Tropospheric clouds in Antarctica, *Reviews of Geophysics*, 50, <https://doi.org/10.1029/2011RG000363>, 2012.
- Canas, T. A., Murray, J. E., and Harries, J. E.: Tropospheric airborne Fourier transform spectrometer (TAFTS), <https://doi.org/10.1117/12.301139>, <https://doi.org/10.1117/12.301139>, 1997.
- Clarisse, B., L., Coheur, P.-F., Prata, F., Hadji-Lazaro, J., Hurtmans, D., and Clerbaux, C.: A unified approach to infrared aerosol remote sensing and type specification, *Atmos. Chem. Phys.*, 13, 2195–2221, 2013.
- Clough, S. A., Shephard, M. W., Mlawer, E., Delamere, J. S., Iacono, M. J., Cady-Pereira, K., Boukabara, S., and Brown, P. D.: Atmospheric radiative transfer modeling: a summary of the AER codes, *J QUANT SPECTROSC RA*, 91, 233–244, 2005.
- Dee, D., Uppala, S., Simmons, A., Berrisford, P., Poli, P., Kobayashi, S., Andrae, U., Alonso-Balmaseda, M., Balsamo, G., Bauer, P., Bechtold, P., Beljaars, A., van de Berg, L., Bidlot, J.-R., Bormann, N., Delsol, C., Dragani, R., Fuentes, M., Geer, A. J., Haimberger, L., Healy, S., Hersbach, H., Hólm, E. V., Isaksen, I., Kållberg, P., Köhler, M., Matricardi, M., McNally, A., Monge-Sanz, B., Morcrette, J.-J., Peubey, C., de Rosnay, P., Tavolato, C., Thépaut, J.-N., and Vitart, F.: The ERA-Interim reanalysis: Configuration and performance of the data assimilation system – This report is superseded by the version published in *Q J Roy Meteor Soc.*, p. 71, <https://www.ecmwf.int/node/8946>, 2011.
- Demmel, J., Dumitriu, I., and Holtz, O.: Fast linear algebra is stable, *NUMER MATH*, 108, 59–91, 2007.
- Evans, K. F. and Stephens, G. L.: A new polarized atmospheric radiative transfer model, *J QUANT SPECTROSC RA*, 46, 413–423, 1991.
- Eyre, J. R.: Inversion of cloudy satellite sounding radiances by nonlinear optimal estimation. I: Theory and simulation for TOVS, *Q J ROY METEOR SOC*, 115, 1001–1026, 1989.
- Hahn, C. J., Rossow, W. B., and Warren, S. G.: ISCCP cloud properties associated with standard cloud types identified in individual surface observations, *J CLIMATE*, 14, 11–27, 2001.
- Huang, X., Chen, X., Zhou, D. K., and Liu, X.: An observationally based global band-by-band surface emissivity dataset for climate and weather simulations, *J ATMOS SCI*, 73, 3541–3555, 2016.
- Lachlan-Cope, T.: Antarctic clouds, *POLAR RES*, 29, 150–158, 2010.
- Lavanant, L. and Lee, A. C. L.: A global cloud detection scheme for high spectral resolution instruments, in: *International TOVS Study Conference-XIV Proceedings*, 2002.
- Maestri, T., Rizzi, R., Tosi, E., Veglio, P., Palchetti, L., Bianchini, G., Di Girolamo, P., Masiello, G., Serio, C., and Summa, D.: Analysis of cirrus cloud spectral signatures in the far infrared, *J QUANT SPECTROSC RA*, 141, 49–64, 2014.

- Maestri, T., Arosio, C., Rizzi, R., Palchetti, L., Bianchini, G., and Del Guasta, M.: Antarctic ice cloud identification and properties using downwelling spectral radiance from 100 to 1400  $\text{cm}^{-1}$ , 2018JD029205 JGR, 124, 4761–4781, 2019.
- Malinowski, E. R.: Factor Analysis in Chemistry, Wiley and Sons, 2002.
- McNally, A. P. and Watts, P. D.: A cloud detection algorithm for high-spectral-resolution infrared sounders, Q J ROY METEOR SOC, 129, 5 3411–3423, 2003.
- Merrelli, A.: The Atmospheric Information Content of Earth's Far Infrared Spectrum, Ph.D. thesis, University of Wisconsin-Madison, Madison, Wisconsin, 2012.
- Mlawer, E. J., Payne, V. H., Moncet, J. L., Delamere, J. S., Alvarado, M. J., and Tobin, D. C.: Development and recent evaluation of the MT\_CKD model of continuum absorption, PHILOS T ROY SOC A, 370, 2520–2556, 2012.
- 10 Palchetti, L., Di Natale, G., and Bianchini, G.: Remote sensing of cirrus cloud microphysical properties using spectral measurements over the full range of their thermal emission, J GEOPHYS RES-ATMOS, 121, 10 804–10 819, 2016.
- Pavelin, E. G., English, S. J., and Eyre, J. R.: The assimilation of cloud affected infrared satellite radiances for numerical weather prediction, Q J ROY METEOR SOC, 134, 737–749, 2008.
- Peña, O. and Pal, U.: Scattering of electromagnetic radiation by a multilayered sphere, COMPUT PHYS COMMUN, 180, 2348–2354, 2009.
- 15 Pickering, J. C., Fox, C., Murray, J. E., and Last, A.: The Cirrus Coupled Cloud-Radiation Experiment: CIRCCREX, in: Fourier Transform Spectroscopy and Hyperspectral Imaging and Sounding of the Environment, p. JM3A.14, Optical Society of America, <https://doi.org/10.1364/FTS.2015.JM3A.14>, <http://www.osapublishing.org/abstract.cfm?URI=FTS-2015-JM3A.14>, 2015.
- Raz, R.: On the Complexity of Matrix Product, SIAM J COMPUT, 32, 1356–1369, 2003.
- Remedios, J. J., Leigh, R. J., Waterfall, A. M., Moore, D. P., Sembhi, H., Parkes, I., Greenhough, J., Chipperfield, M. P., and Hauglustaine, 20 D.: MIPAS reference atmospheres and comparisons to V4.61/V4.62 MIPAS level 2 geophysical data sets, ATMOS CHEM PHYS, 7, 9973–10017, 2007.
- Rossow, W. B. and Schiffer, R. A.: Advances in Understanding Clouds from ISCCP, B AM METEOROL SOC, 80, 2261–2287, 1999.
- Rothman, L., Gordon, I., Babikov, Y., Barbe, A., Benner, D. C., Bernath, P., Birk, M., Bizzocchi, L., Boudon, V., Brown, L., Campargue, A., Chance, K., Cohen, E., Coudert, L., Devi, V., Drouin, B., Fayt, A., Flaud, J.-M., Gamache, R., Harrison, J., Hartmann, J.-M., Hill, 25 C., Hodges, J., Jacquemart, D., Jolly, A., Lamouroux, J., Roy, R. L., Li, G., Long, D., Lyulin, O., Mackie, C., Massie, S., Mikhailenko, S., Müller, H., Naumenko, O., Nikitin, A., Orphal, J., Perevalov, V., Perrin, A., Polovtseva, E., Richard, C., Smith, M., Starikova, E., Sung, K., Tashkun, S., Tennyson, J., Toon, G., Tyuterev, V., and Wagner, G.: The HITRAN2012 molecular spectroscopic database, Journal of Quantitative Spectroscopy and Radiative Transfer, 130, 4 – 50, <https://doi.org/https://doi.org/10.1016/j.jqsrt.2013.07.002>, <http://www.sciencedirect.com/science/article/pii/S0022407313002859>, HITRAN2012 special issue, 2013.
- 30 Serio, C., Lubrano, A. M., Romano, F., and Shimoda, H.: Cloud detection over sea surface by use of autocorrelation functions of upwelling infrared spectra in the 800–900- $\text{cm}^{-1}$  window region, Appl. Opt., 39, 3565–3572, <https://doi.org/10.1364/AO.39.003565>, <http://ao.osa.org/abstract.cfm?URI=ao-39-21-3565>, 2000.
- Serio, C., Masiello, G., Esposito, F., Girolamo, P. D., Iorio, T. D., Palchetti, L., Bianchini, G., Muscari, G., Pavese, G., Rizzi, R., Carli, B., and Cuomo, V.: Retrieval of foreign-broadened water vapor continuum coefficients from emitted spectral radiance in the H<sub>2</sub>O rotational band 35 from 240 to 590  $\text{cm}^{-1}$ , Opt. Express, 16, 15 816–15 833, <https://doi.org/10.1364/OE.16.015816>, <http://www.opticsexpress.org/abstract.cfm?URI=oe-16-20-15816>, 2008.
- Sinha, A. and Harries, J.: Water vapour and greenhouse trapping: The role of far infra-red absorption, GEOPHYS RES LETT, 22, 2147–2150, 1995.

- Turner, D. D., Knuteson, R. O., and Revercomb, H. E.: Noise Reduction of Atmospheric Emitted Radiance Interferometer (AERI) Observations Using Principal Component Analysis, *J ATMOS OCEAN TECH*, 23, 1223–1238, 2006.
- Veglio, P. and Maestri, T.: Statistics of vertical backscatter profiles of cirrus clouds, *ATMOS CHEM PHYS*, 11, 12925–12943, 2011.
- Wilks, D. S.: *Statistical Methods in the Atmospheric Sciences*, Elsevier Science Publishing, 2006.
- 5 Wilson, H. S., Atkinson, N., and Smith, J.: The Development of an Airborne Infrared Interferometer for Meteorological Sounding Studies, *Journal of Atmospheric and Oceanic Technology - J ATMOS OCEAN TECHNOL*, 16, [https://doi.org/10.1175/1520-0426\(1999\)016<1912:TDOAAI>2.0.CO;2](https://doi.org/10.1175/1520-0426(1999)016<1912:TDOAAI>2.0.CO;2), 1999.
- Yang, P., Bi, L., Baum, B. A., Liou, K.-N., Kattawar, G. W., Mishchenko, M. I., and Cole, B.: Spectrally Consistent Scattering, Absorption, and Polarization Properties of Atmospheric Ice Crystals at Wavelengths from 0.2 to 100  $\mu\text{m}$ , *Journal of the Atmospheric Sciences*, 70,  
10 330–347, 2013.
